# Supplementary material for: Chromosomal instability in enterohaemorrhagic Escherichia coli O157:H7: impact on adherence, tellurite resistance and colony phenotype
Source: PubMed Central journal article supplement (PMC3064760; doi:10.1111/j.1365-2958.2010.07499.x), 2011-01-04
Supplement: mmi0079-1024-SD1.pdf [file mmi0079-1024-SD1.pdf]

# Supporting Information

## **Chromosomal Instability in Enterohaemorrhagic *Escherichia coli* O157:H7:**

### **Impact on Adherence, Tellurite Resistance and Colony Phenotype**

Martina Bielaszewska<sup>1,2\*#</sup>, Barbara Middendorf<sup>1#</sup>, Phillip I. Tarr<sup>3</sup>, Wenlan Zhang<sup>1</sup>, Rita Prager<sup>4</sup>, Thomas Aldick<sup>1</sup>, Ulrich Dobrindt<sup>1,5</sup>, Helge Karch<sup>1,2</sup>, and Alexander Mellmann<sup>1,2</sup>

<sup>1</sup> Institute of Hygiene and the National Consulting Laboratory on Haemolytic Uraemic Syndrome, University of Münster, Robert Koch Str. 41, 48149 Münster, Germany

<sup>2</sup> Interdisciplinary Centre of Clinical Research (IZKF) Münster, University of Münster, Domagkstr. 3, 48149 Münster, Germany

<sup>3</sup> Division of Paediatric Gastroenterology and Nutrition, Edward Mallinckrodt Department of Paediatrics, Washington University School of Medicine and St. Louis Children's Hospital, 660 South Euclid Avenue, St. Louis, MO 63110, USA

<sup>4</sup> National Reference Centre for Salmonella and Other Bacterial Enteric Pathogens, Robert Koch Institute, Branch Wernigerode, Burgstr. 37, 38855 Wernigerode, Germany

<sup>5</sup> Institute for Molecular Infection Biology, University of Würzburg, Josef-Schneider-Str. 2, 97080 Würzburg, Germany

# Both authors contributed equally

\*Corresponding author:

Dr. Martina Bielaszewska, Institut für Hygiene, Universität Münster, Robert Koch Str. 41, 48149 Münster, Germany

Phone: ++49-251-980-2849; Fax: ++49-251-980-2868; E-mail: [mbiela@uni-muenster.de](mailto:mbiela@uni-muenster.de)

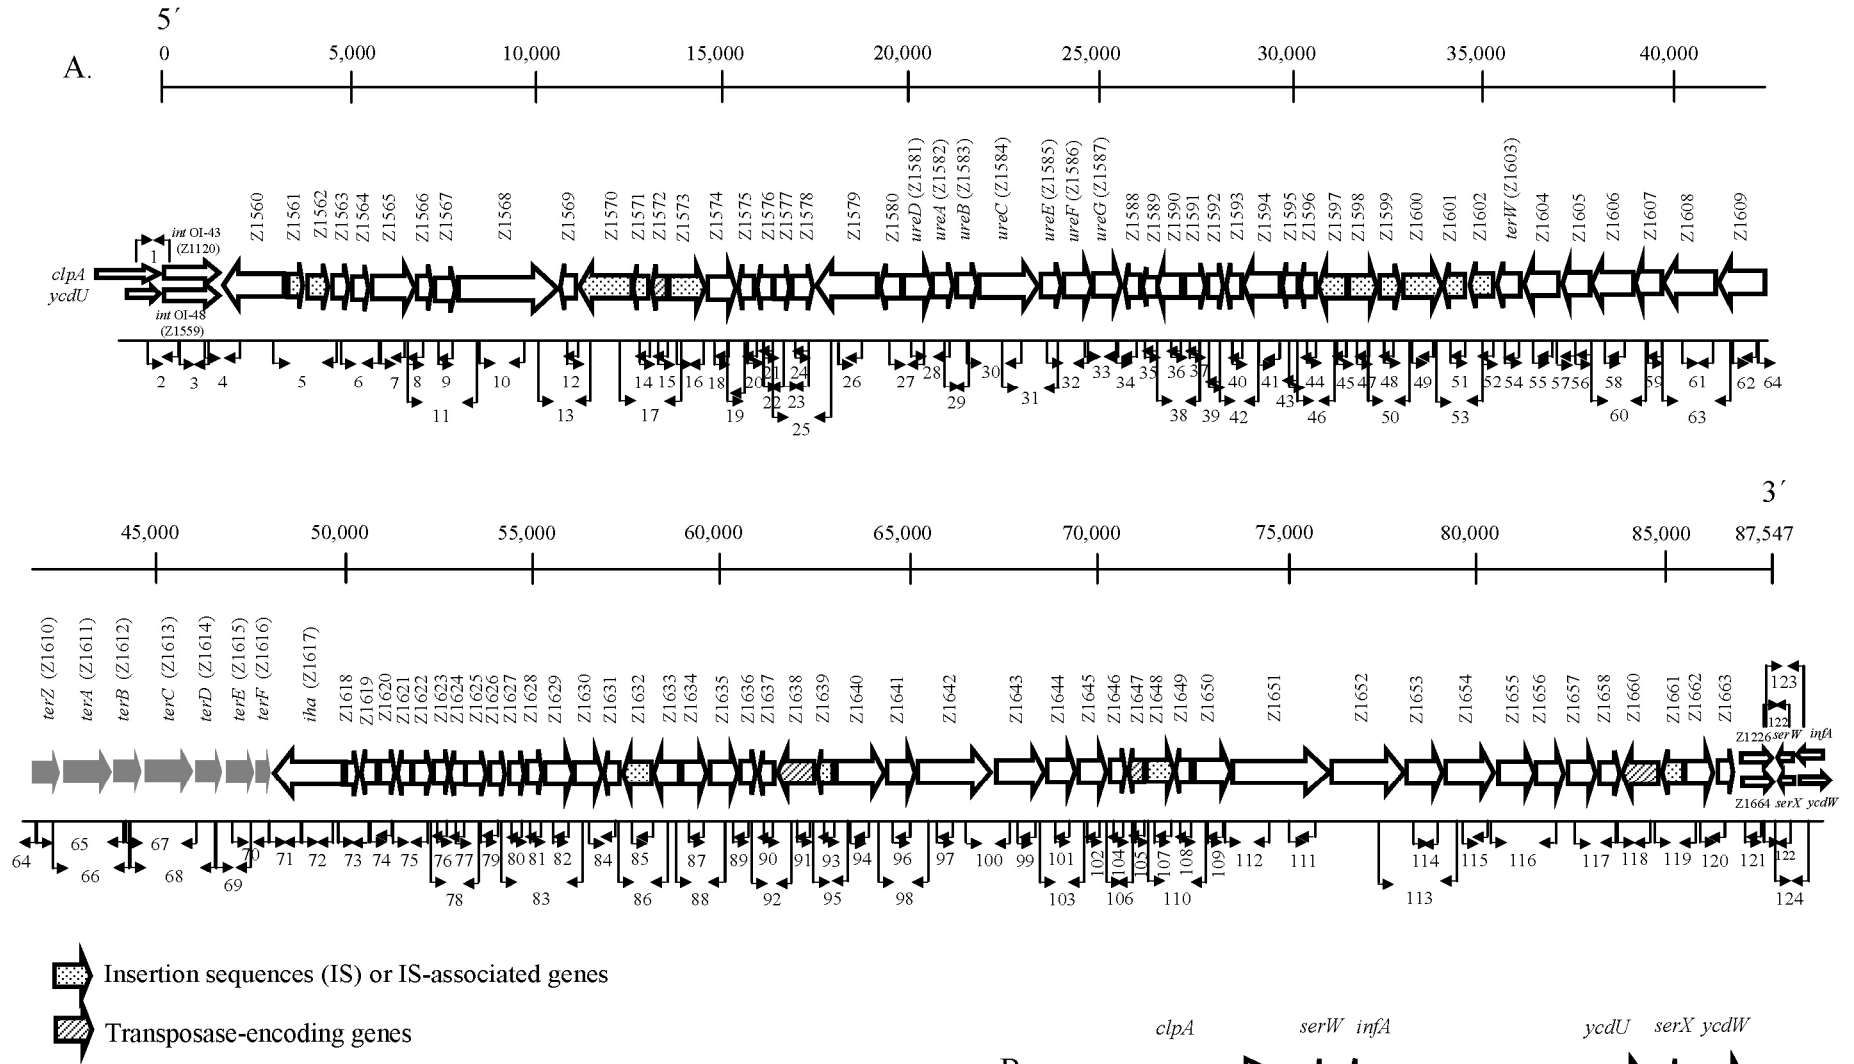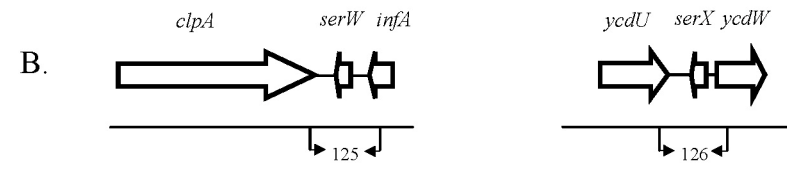

**Fig. S1.** PCR strategy to characterize tellurite resistance (Tel<sup>R</sup>)-encoding islands and their integration sites in L and S colonies of *E. coli* O157:H7 strains.

A. Physical map of O island (OI) 48 and its flanks in *E. coli* O157:H7 strain EDL933 and positions of primers used to map Tel<sup>R</sup>-encoding islands. Large arrows indicate ORFs of OI 48 (designations above arrows). Striped arrows denote putative transposases. Dotted arrows indicate insertion sequences (IS) and IS-associated genes. *ter* genes are grey. The duplicated arrows at the 5' and 3' ends of the island indicate respective ORFs at these positions in OI 48 (Z1559 [putative P4-family integrase of OI 48] and Z1664, respectively; lower arrows) and in OI 43 (Z1120 [putative P4-family integrase of OI 43] and Z1226, respectively; upper arrows). Moreover, genes upstream of the first ORF of OI 48 (*ycdU*) and OI 43 (*clpA*) and downstream of the last ORF of OI 48 (*serX*, *ycdW*) and OI 43 (*serW*, *infA*) are indicated by double arrows. The scale (in bp) is above the graph. Small arrows indicate positions of PCR primers; the numbers below the small arrows indicate PCR numbers in Table S1, which describes PCR conditions.

B. Strategy to investigate occupancy of *serW* and *serX*, the respective integration sites for OI 43 and OI 48 in EDL933.

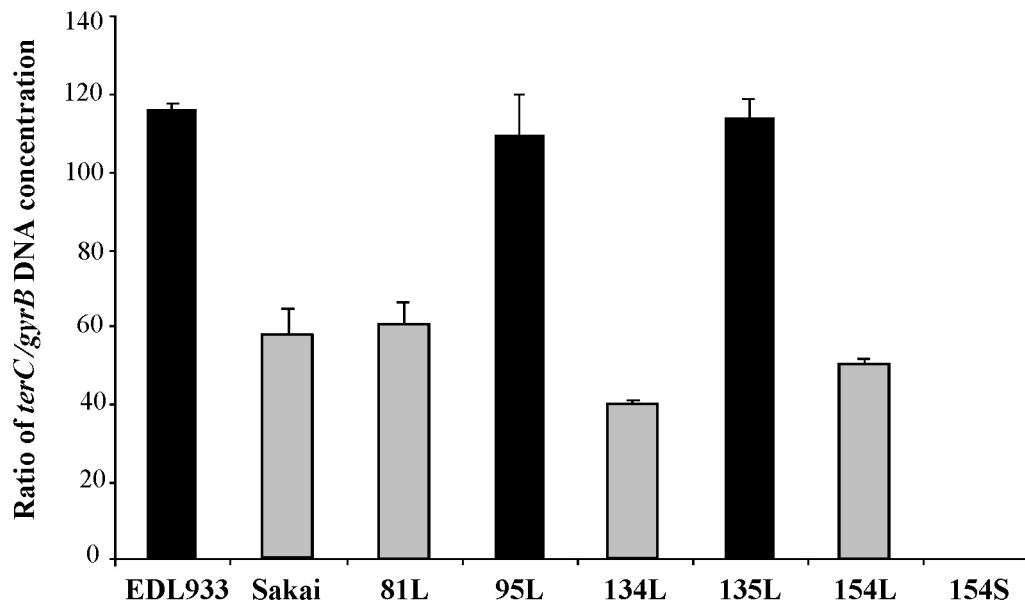

**Fig. S2.** Number of copies of  $Tel^R$ -encoding island in L strains. The *terC* DNA was quantified using light-cycler PCR and normalized to *gyrB* DNA. The *terC*/*gyrB* DNA ratio for each strain represents a mean  $\pm$  standard deviation from three independent experiments. Strains with two copies or one copy of *terC* are depicted by black or grey bars, respectively. Strains EDL933 (GenBank accession no. AE005174; 2 copies of the *ter* cluster), Sakai RIMD 0509952 (GenBank accession no. NC\_002695; 1 copy of the *ter* cluster), and 154S (lacking the *ter* cluster) were used as controls.

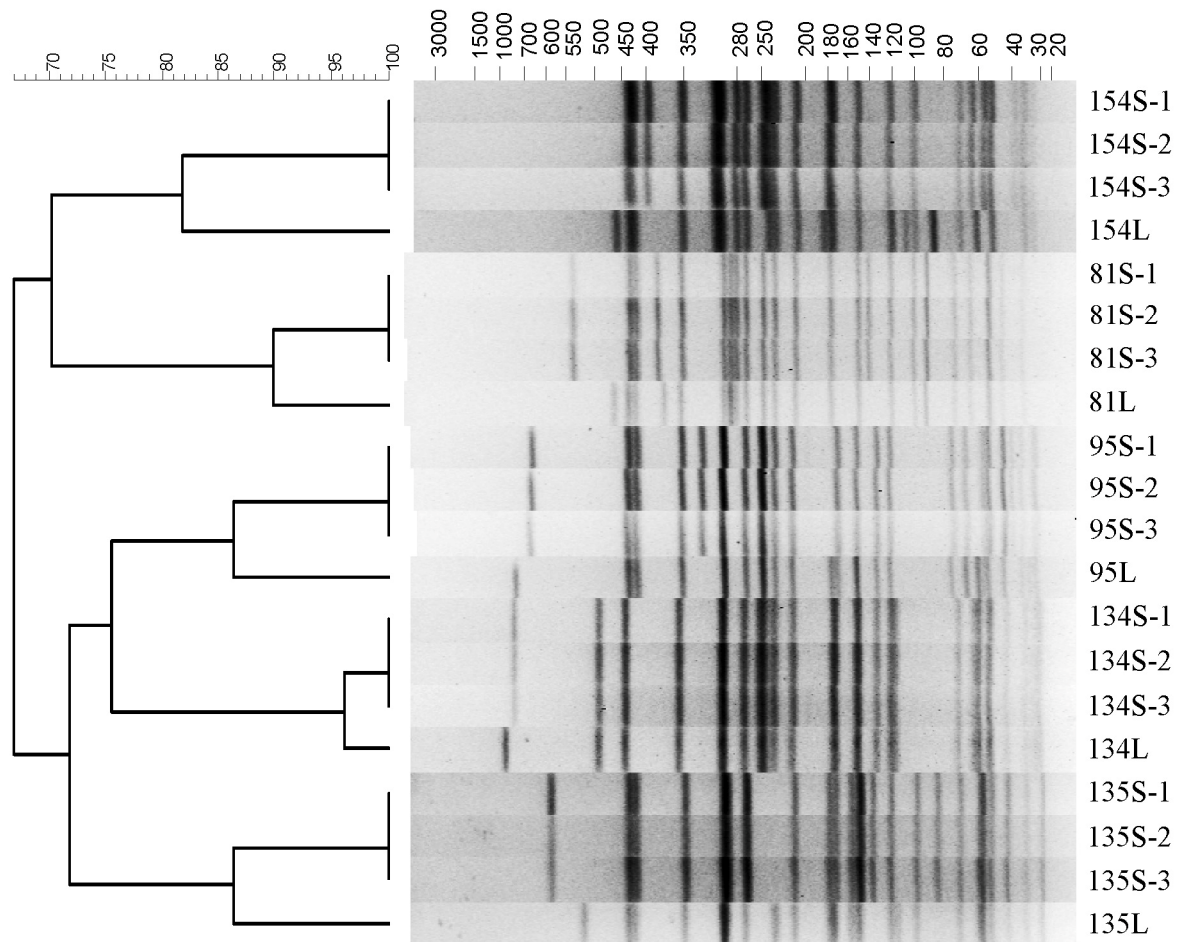

**Fig. S3.** PFGE of *XbaI*-digested genomic DNA from L and S strains. Chromosomal DNA from strains 81L, 95L, 134L, 135L, and 154 L and from three independent S colonies derived from each L strain was digested with *XbaI* and subjected to PFGE as described in Experimental procedures. The cluster analysis was performed using UPGMA (Unweighted Pair Group Method with Arithmetic Mean) in BioNumerics software 5.1. Strain numbers are shown to the right from the gel (three independent S colonies derived from each L strain are designated by strain number and the end numbers 1 to 3). Molecular weight scale (based on *XbaI*-digested DNA of *Salmonella enterica* serovar Braenderup strain H9812) is given above the gel.

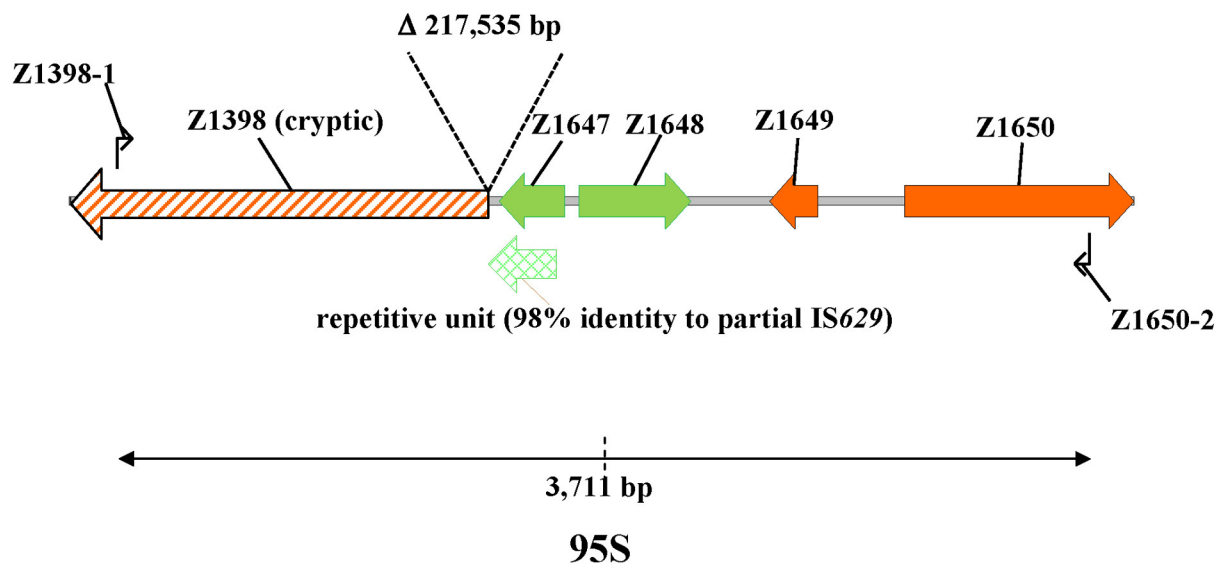

**Fig. S4.** Deletion of OI 48 and the upstream core genome region in strain 95S. The size and genetic organisation of the connecting fragment amplified with primers Z1398-1 and Z1650-2 (small arrows) that spans the internal deletion of OI 48 plus deleted parts of the core chromosome. Position and size of the deleted DNA region (217,535 bp) is indicated above the graph by dotted lines. ORFs with similarity to mobile genetic elements (putative transposases and insertion sequences) are highlighted in green.

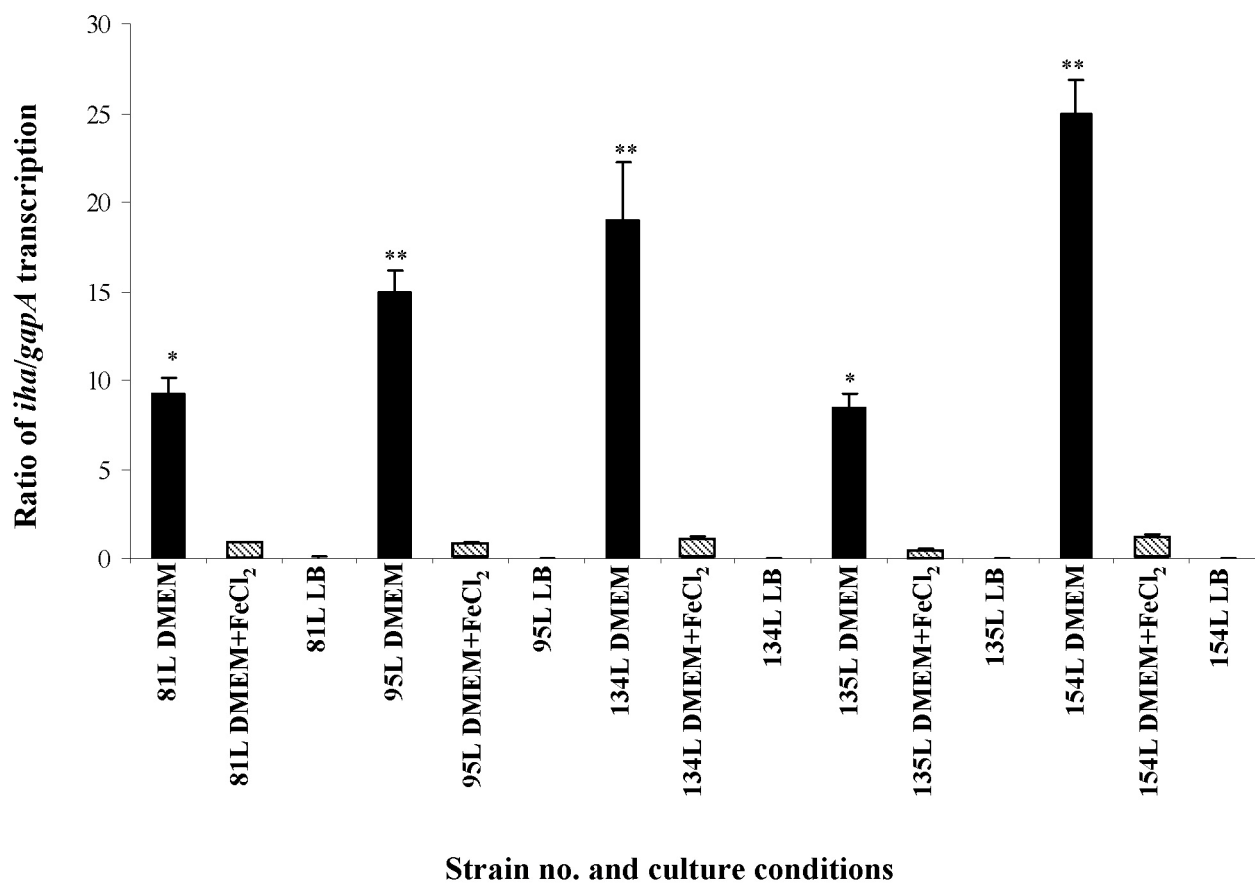

**Fig. S5.** *iha* transcription in L strains is upregulated in iron-limited conditions. The *iha*-positive L strains were cultured in DMEM (iron content  $< 0.05 \mu\text{g ml}^{-1}$ ), DMEM with  $10 \mu\text{M FeCl}_2$  (iron content  $0.50 \mu\text{g ml}^{-1}$ ) or LB broth (iron content  $0.59 \mu\text{g ml}^{-1}$ ) and *iha* transcription was determined using quantitative real-time reverse transcription PCR and normalized to *gapA* transcription. The ratio of *iha/gapA* transcription was 8.4-24.9,  $\leq 1.0$ , and  $\leq 0.04$ , respectively. Data are presented as means  $\pm$  standard deviations from three experiments performed with three independently isolated RNA preparations. Differences between relative transcription of *iha* in DMEM and in each of the other two media are indicated \* ( $p < 0.05$ ) and \*\* ( $p < 0.001$ ) (unpaired Student's *t* test).

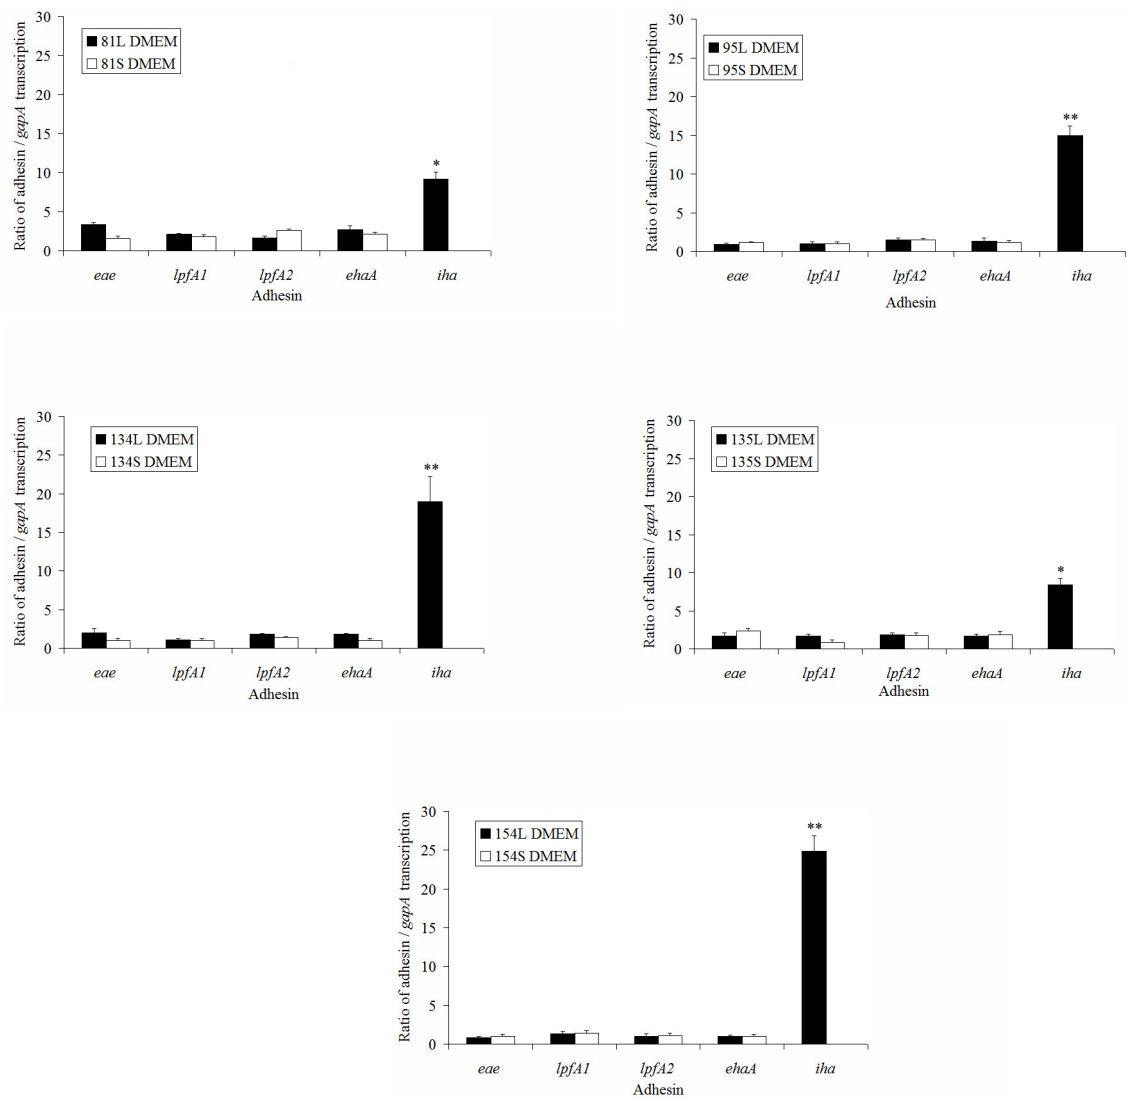

**Fig. S6.** Transcription analysis of *iha* and non-*iha* adhesin genes (*eae*, *lpfA1*, *lpfA2*, *ehaA*) in L and S strains grown under iron-limited conditions. The strains were cultured in DMEM (iron content  $< 0.05 \mu\text{g ml}^{-1}$ ) and transcription of each gene was determined using quantitative real-time reverse transcription PCR and normalized to *gapA* transcription. Data are presented as means  $\pm$  standard deviations from three experiments performed with three independently isolated RNA preparations. Differences between relative transcription of *iha* and each of the non-*iha* adhesin genes are indicated \* ( $p < 0.05$ ) and \*\* ( $p < 0.001$ ) (unpaired Student's *t* test).



Table S1. PCR primers and conditions used for mapping and analysis of deletions of  $Tel^R$ -encoding islands.

| PCR No. | Primer <sup>a</sup>  | Sequence (5' - 3')                              | Target                                                                          | PCR conditions <sup>b</sup> |            |            | PCR product (bp) | Position of the primer <sup>c</sup> |
|---------|----------------------|-------------------------------------------------|---------------------------------------------------------------------------------|-----------------------------|------------|------------|------------------|-------------------------------------|
|         |                      |                                                 |                                                                                 | Denaturing                  | Annealing  | Extension  |                  |                                     |
| 1       | clpA-f<br>int-4      | CTGTTTGGTTCGCTGGTGGAC<br>CCATTTCCCCCGCCCCTTTAC  | <i>clpA</i> -integrase OI 43<br>(left junction of OI 43<br>and the core genome) | 94°C, 30 s                  | 56°C, 60 s | 72°C, 60 s | 756              | 2161-2181 <sup>d</sup><br>280-260   |
| 2       | serX-F<br>OI 48 CI-R | TGTCGATTCTCTGGCATAA<br>AAGTTGCTCTCGCATTATCC     | <i>ycdU</i> -integrase OI 48<br>(left junction of OI 48<br>and the core genome) | 95°C, 45 s                  | 58°C, 45 s | 72°C, 90 s | 678              | 913-932 <sup>e</sup><br>397-378     |
| 3       | int-1<br>int-2       | AATCTGAGAAAGTCGCTATCC<br>CACTGACGGCTTTCTTTTTTAC | integrase<br>OI 43/OI 48                                                        | 94°C, 30 s                  | 54°C, 60 s | 72°C, 60 s | 708              | 435-455<br>1142-1122                |
| 4       | Z1559-1<br>Z1560-2   | GAATGAAAGCCAGGATAC<br>ATAAGCCTGTTTGATGGA        | Z1559-Z1560                                                                     | 94°C, 30 s                  | 50°C, 60 s | 72°C, 60 s | 767              | 972-989<br>1738-1721                |
| 5       | Z1560-1<br>Z1563-2   | TAGCCAGAACACCAAAC<br>AGTTCAGGCATCCGTAAG         | Z1560-Z1563                                                                     | 94°C, 30 s                  | 51°C, 60 s | 72°C, 90 s | 1,228            | 3310-3327<br>4537-4520              |
| 6       | Z1563-1<br>Z1565-4   | CAGCAGTCAAAGGTGTTA<br>CGGATAAGGATTTTCTGG        | Z1563-Z1565                                                                     | 94°C, 30 s                  | 49°C, 60 s | 72°C, 60 s | 743              | 4708-4725<br>5450-5433              |
| 7       | Z1565-1<br>Z1565-2   | AACGCATCTGAATAAAC<br>AGACAACCGCACATACTC         | Z1565                                                                           | 94°C, 30 s                  | 51°C, 60 s | 72°C, 60 s | 688              | 5849-5866<br>6536-6518              |
| 8       | Z1565-3<br>Z1566-2   | TGTCGCACCTAACTTTGA<br>ATTTTTTCATACCTATAA        | Z1565-1566                                                                      | 94°C, 30 s                  | 48°C, 60 s | 72°C, 60 s | 381              | 6779-6796<br>7159-7142              |

| PCR No. | Primer <sup>a</sup> | Sequence (5' - 3') | Target      | PCR conditions <sup>b</sup> |            |             | PCR product (bp) | Position of the primer <sup>c</sup> |
|---------|---------------------|--------------------|-------------|-----------------------------|------------|-------------|------------------|-------------------------------------|
|         |                     |                    |             | Denaturing                  | Annealing  | Extension   |                  |                                     |
| 9       | Z1567-1             | ATTCATTTTATCGGCTAC | Z1567       | 94°C, 30 s                  | 49°C, 60 s | 72°C, 60 s  | 256              | 7885-7902<br>8140-8123              |
|         | Z1567-2             | TACGCCTCAGAATAATAC |             |                             |            |             |                  |                                     |
| 10      | Z1568-1             | ATCAGTGGGCTTTTCTTG | Z1568       | 94°C, 30 s                  | 53°C, 60 s | 72°C, 60 s  | 862              | 9120-9137<br>9981-9964              |
|         | Z1568-4             | ATCGCAGAAAATGAAACC |             |                             |            |             |                  |                                     |
| 11      | Z1565-3             | TGTCGCACCTAACTTTGA | Z1565-Z1568 | 94°C, 30 s                  | 51°C, 60 s | 72°C, 120 s | 1,628            | 6779-6796<br>8406-8389              |
|         | Z1568-2             | GAGACCAGACGGGCATTT |             |                             |            |             |                  |                                     |
| 12      | Z1569-1             | TTTGCCATAATCGCTTCT | Z1569       | 94°C, 30 s                  | 50°C, 60 s | 72°C, 60 s  | 212              | 10907-10924<br>11118-11101          |
|         | Z1569-2             | ATCGGTAATCTTGAGGAA |             |                             |            |             |                  |                                     |
| 13      | Z1568-3             | CGTATCCTGTGCTGCTCA | Z1568-Z1570 | 94°C, 60 s                  | 54°C, 60 s | 72°C, 90 s  | 1,042            | 10605-10622<br>11646-11629          |
|         | Z1570-2             | TCCTGTTCTTCGGCTCTG |             |                             |            |             |                  |                                     |
| 14      | Z1571-1             | TACCTTCCAGCAGCATCG | Z1571       | 94°C, 30 s                  | 56°C, 60 s | 72°C, 60 s  | 290              | 13097-13114<br>13386-13369          |
|         | Z1571-2             | GTTACCTTTCGGGACCAA |             |                             |            |             |                  |                                     |
| 15      | Z1572-1             | GCTTACGATTACGCTGAA | Z1572       | 94°C, 30 s                  | 52°C, 60 s | 72°C, 60 s  | 255              | 13858-13875<br>14112-14095          |
|         | Z1572-2             | TATGGAAGAACGGAACAG |             |                             |            |             |                  |                                     |
| 16      | Z1573-1             | GTATCCAGGAGCGGTTAT | Z1573       | 94°C, 60 s                  | 54°C, 60 s | 72°C, 60 s  | 758              | 14316-14332<br>15073-15056          |
|         | Z1573-4             | GAGATATTCCCCAGACGA |             |                             |            |             |                  |                                     |
| 17      | Z1570-1             | CAGCAGGAAGATGTCGTC | Z1570-Z1573 | 94°C, 60 s                  | 54°C, 60 s | 72°C, 120 s | 1,423            | 12962-12979<br>14384-14367          |
|         | Z1573-2             | CCGCTCATCACTTTGTTT |             |                             |            |             |                  |                                     |
| 18      | Z1574-3             | CAAAGCAGACAAAATGGA | Z1574       | 94°C, 60 s                  | 53°C, 60 s | 72°C, 60 s  | 332              | 15333-15350<br>15664-15647          |
|         | Z1574-4             | GGTATTTATGCTGGTTGC |             |                             |            |             |                  |                                     |

| PCR No. | Primer <sup>a</sup> | Sequence (5' - 3')                                 | Target                            | PCR conditions <sup>b</sup> |            |             | PCR product (bp) | Position of the primer <sup>c</sup> |
|---------|---------------------|----------------------------------------------------|-----------------------------------|-----------------------------|------------|-------------|------------------|-------------------------------------|
|         |                     |                                                    |                                   | Denaturing                  | Annealing  | Extension   |                  |                                     |
| 19      | Z1574-1<br>Z1575-2  | CTCTCGGTGTTGGACTGG<br>CAAACCGAACGCTGAAGA           | Z1574-Z1575                       | 94°C, 30 s                  | 53°C, 60 s | 72°C, 60 s  | 462              | 15458-15475<br>15919-15902          |
| 20      | Z1575-1<br>Z1575-4  | TATTATTTCCCTGTCAC<br>AGGAGGTTCTGTTATGGA            | Z1575                             | 94°C, 60 s                  | 48°C, 60 s | 72°C, 60 s  | 244              | 15837-15854<br>16080-16063          |
| 21      | Z1576-3<br>Z1576-4  | CGGAGACGCCATTATTTT<br>TTTGAACCTCCTGATGTCG          | Z1576                             | 94°C, 30 s                  | 48°C, 60 s | 72°C, 60 s  | 202              | 16141-16158<br>16342-16325          |
| 22      | Z1576-3<br>Z1577-2  | CGGAGACGCCATTATTTT<br>ATTGATGACCTCTTTGCT           | Z1576-Z1577                       | 94°C, 30 s                  | 50°C, 60 s | 72°C, 60 s  | 439              | 16141-16158<br>16579-16562          |
| 23      | Z1577-1<br>Z1578-2  | AGGTCATCAATCTGGTAT<br>GCAACTAAAATCGTAATC           | Z1577-Z1578                       | 94°C, 30 s                  | 48°C, 60 s | 72°C, 60 s  | 824              | 16569-16586<br>17392-17375          |
| 24      | Z1578-3<br>Z1578-2  | GAGTGCATTCTGGTTCTG<br>GCAACTAAAATCGTAATC           | Z1578                             | 94°C, 30 s                  | 47°C, 60 s | 72°C, 60 s  | 224              | 17169-17186<br>17392-17375          |
| 25      | Z1576-1<br>Z1579-4  | CGGCATCATTCACTACTGG<br>TCGTTACTGGGGTTATGG          | Z1576-Z1579                       | 94°C, 60 s                  | 51°C, 60 s | 72°C, 120 s | 1,243            | 16351-16368<br>17593-17576          |
| 26      | Z1579-1<br>Z1579-2  | GGATTCGCTTACATACAC<br>TGTGGTTTTTATTTACGG           | Z1579                             | 94°C, 30 s                  | 48°C, 60 s | 72°C, 60 s  | 630              | 18145-18162<br>18774-18757          |
| 27      | Z1580-1<br>UreD-r   | TGTCGCTTCCCAAGAAAAGG<br>GCGTGGCTCCGGCGTAGTTTT      | Z1580- <i>ureD</i> (Z1581)        | 94°C, 30 s                  | 58°C, 60 s | 72°C, 90 s  | 1,081            | 19578-19598<br>20658-20638          |
| 28      | UreD-f<br>UreA-r    | CGTCATCATGTCGGTCTGCTCA<br>CAGATTATCGGATTATGGACGGTA | <i>ureD-ureA</i><br>(Z1581-Z1582) | 94°C, 30 s                  | 58°C, 60 s | 72°C, 90 s  | 1,040            | 20070-20091<br>21109-21086          |

| PCR No. | Primer <sup>a</sup> | Sequence (5' - 3')                                    | Target                            | PCR conditions <sup>b</sup> |            |             | PCR product (bp) | Position of the primer <sup>c</sup> |
|---------|---------------------|-------------------------------------------------------|-----------------------------------|-----------------------------|------------|-------------|------------------|-------------------------------------|
|         |                     |                                                       |                                   | Denaturing                  | Annealing  | Extension   |                  |                                     |
| 29      | UreA-f<br>UreB-r    | GACTCCAAGAGAAAAAGACAACTA<br>ACCCATTATATCTCCGCGGAAACCG | <i>ureA-ureB</i><br>(Z1582-Z1583) | 94°C, 30 s                  | 56°C, 60 s | 72°C, 60 s  | 600              | 20816-20840<br>21415-21391          |
| 30      | UreB-f<br>UreC-r    | GCTACCTGCAGTATTATCGTTGAA<br>GAGGAAGGCAGAATATTGGG      | <i>ureB-ureC</i><br>(Z1583-Z1584) | 94°C, 30 s                  | 57°C, 60 s | 72°C, 90 s  | 1,146            | 21176-21199<br>22321-22302          |
| 31      | UreC-f<br>UreE-r    | TCTAACGCCACAACCTGTAC<br>CGTGATTATGGGCGTGCGACTT        | <i>ureC-ureE</i><br>(Z1584-Z1585) | 94°C, 30 s                  | 56°C, 60 s | 72°C, 120 s | 1,666            | 21924-21943<br>23589-23568          |
| 32      | UreE-f<br>UreF-r    | GAGACCCCGGCTCAGACAACCT<br>ACGGAATAATCGGGAATACTGGG     | <i>ureE-ureF</i><br>(Z1585-Z1586) | 94°C, 30 s                  | 60°C, 60 s | 72°C, 90 s  | 1,110            | 23169-23189<br>24278-24256          |
| 33      | UreF-f<br>UreG-r    | ACTGGAGTGGGCAGTGGAAGC<br>GATGTTTTGCAGACCTTCACCAC      | <i>ureF-ureG</i><br>(Z1586-Z1587) | 94°C, 30 s                  | 59°C, 60 s | 72°C, 90 s  | 1,182            | 23693-23713<br>24874-24852          |
| 34      | UreG-f<br>Z1588-2   | GGTCCGGTCGGCTCAGGTA<br>GTTTGAAAAATCGGCATCTGG          | <i>ureG</i> (Z1587)-Z1588         | 94°C, 30 s                  | 57°C, 60 s | 72°C, 60 s  | 699              | 24335-24355<br>25033-25013          |
| 35      | Z1589-3<br>Z1589-2  | AACTGATAACCGATACCG<br>AGGCACTTTAGGACAATG              | Z1589                             | 94°C, 30 s                  | 51°C, 60 s | 72°C, 60 s  | 226              | 25172-25189<br>25397-25380          |
| 36      | Z1590-1<br>Z1590-2  | CATCTGGGTTTTTACTTC<br>AAAAGTTATGATGATTGC              | Z1590                             | 94°C, 30 s                  | 47°C, 60 s | 72°C, 40 s  | 106              | 25584-25601<br>25689-25672          |
| 37      | Z1591-1<br>Z1591-4  | ATTGAACTGGATGGTGTA<br>CCTTTTTTCGCATCAACA              | Z1591                             | 94°C, 30 s                  | 48°C, 60 s | 72°C, 40 s  | 155              | 26227-26244<br>26381-26364          |
| 38      | Z1589-1<br>Z1591-2  | GAGTACCGAGCCCTTTTC<br>AAACGGATGCGACTTAGA              | Z1589-Z1591                       | 94°C, 30 s                  | 52°C, 60 s | 72°C, 90 s  | 945              | 25348-25365<br>26292-26275          |

| PCR No. | Primer <sup>a</sup> | Sequence (5' - 3')  | Target      | PCR conditions <sup>b</sup> |            |            | PCR product (bp) | Position of the primer <sup>c</sup> |
|---------|---------------------|---------------------|-------------|-----------------------------|------------|------------|------------------|-------------------------------------|
|         |                     |                     |             | Denaturing                  | Annealing  | Extension  |                  |                                     |
| 39      | Z1592-3             | GCCTGACCATGTTGCTGA  | Z1592       | 94°C, 30 s                  | 52°C, 60 s | 72°C, 40 s | 93               | 26724-26741                         |
|         | Z1592-4             | GCAAGAACGCCGCAATTT  |             |                             |            |            |                  | 26816-26799                         |
| 40      | Z1593-1             | ACTTTATTGATTTACTGC  | Z1593       | 94°C, 30 s                  | 45°C, 60 s | 72°C, 40 s | 135              | 27259-27276                         |
|         | Z1593-2             | ATAGTTTTAGCAATACCT  |             |                             |            |            |                  | 27393-27376                         |
| 41      | Z1594-1             | ATAGTGGATTTTCGTTTCA | Z1594       | 94°C, 30 s                  | 47°C, 60 s | 72°C, 60 s | 622              | 27779-27796                         |
|         | Z1594-4             | CCCAGAAACACGATAAAG  |             |                             |            |            |                  | 28400-28383                         |
| 42      | Z1592-1             | TGTAAACCGTAAGAAACC  | Z1592-Z1594 | 94°C, 30 s                  | 49°C, 60 s | 72°C, 90 s | 983              | 26819-26836                         |
|         | Z1594-2             | AATAATGAAACGAAATCC  |             |                             |            |            |                  | 27801-27784                         |
| 43      | Z1595-3             | GCAGACTGGCATAAAAAC  | Z1595       | 94°C, 30 s                  | 48°C, 60 s | 72°C, 40 s | 121              | 28839-28856                         |
|         | Z1595-4             | ACACGCAAGCGACCAAAT  |             |                             |            |            |                  | 28959-28942                         |
| 44      | Z1596-1             | TTTCGGGCGCATCATCAG  | Z1596       | 94°C, 30 s                  | 54°C, 60 s | 72°C, 40 s | 131              | 29429-29446                         |
|         | Z1596-2             | GCCGGAACAATACCTCAG  |             |                             |            |            |                  | 29559-29542                         |
| 45      | Z1597-1             | CTCAAGGGGCAGCAACTC  | Z1597       | 94°C, 30 s                  | 57°C, 60 s | 72°C, 60 s | 396              | 29928-29945                         |
|         | Z1597-4             | ATACGGCAATGGCGACAA  |             |                             |            |            |                  | 30323-30306                         |
| 46      | Z1595-1             | CGCTTCTTATGACTGTGC  | Z1595-Z1597 | 94°C, 30 s                  | 54°C, 60 s | 72°C, 90 s | 1,059            | 28902-28919                         |
|         | Z1597-2             | GAAGACCGACTGGAAGAG  |             |                             |            |            |                  | 29960-29943                         |
| 47      | Z1598-3             | TAAACTGGCTTCACAACC  | Z1598       | 94°C, 30 s                  | 52°C, 60 s | 72°C, 60 s | 278              | 30780-30797                         |
|         | Z1598-4             | GGCGGAACTCAACTTTAC  |             |                             |            |            |                  | 31057-31040                         |
| 48      | Z1599-1             | TATGCGTAAATCCTTCAA  | Z1599       | 94°C, 30 s                  | 52°C, 60 s | 72°C, 60 s | 209              | 31187-31204                         |
|         | Z1599-2             | TGGATACCTTACCGTCAC  |             |                             |            |            |                  | 31395-31378                         |

| PCR No. | Primer <sup>a</sup> | Sequence (5' - 3') | Target              | PCR conditions <sup>b</sup> |            |             | PCR product (bp) | Position of the primer <sup>c</sup> |
|---------|---------------------|--------------------|---------------------|-----------------------------|------------|-------------|------------------|-------------------------------------|
|         |                     |                    |                     | Denaturing                  | Annealing  | Extension   |                  |                                     |
| 49      | Z1600-3             | CGGGCATTACTCTCCAAC | Z1600               | 94°C, 30 s                  | 56°C, 60 s | 72°C, 60 s  | 745              | 32214-32231<br>32958-32941          |
|         | Z1600-4             | CGCTGCCAAAGAACATAA |                     |                             |            |             |                  |                                     |
| 50      | Z1598-1             | TCCGCTTTTATCCACTCC | Z1598-Z1600         | 94°C, 30 s                  | 55°C, 60 s | 72°C, 60 s  | 696              | 30993-31010<br>31688-31671          |
|         | Z1600-2             | TATTTCCCGCTCCTCCTC |                     |                             |            |             |                  |                                     |
| 51      | Z1601-1             | ATGTGCTGCTGGCGATAC | Z1601               | 94°C, 30 s                  | 55°C, 60 s | 72°C, 60 s  | 496              | 33376-33393<br>33871-33854          |
|         | Z1601-2             | TGGAAGAGCAGATGAAGC |                     |                             |            |             |                  |                                     |
| 52      | Z1602-1             | ATGCCCTTTCACCTGTTG | Z1602               | 94°C, 30 s                  | 54°C, 60 s | 72°C, 60 s  | 315              | 34098-34115<br>34412-34395          |
|         | Z1602-4             | ATGCTGACGCCTGATAAC |                     |                             |            |             |                  |                                     |
| 53      | Z1600-1             | AGGCGGATAATAATGCTG | Z1600-Z1602         | 94°C, 30 s                  | 55°C, 60 s | 72°C, 120 s | 1,264            | 32881-32898<br>34144-34127          |
|         | Z1602-2             | TTCACTGGCTGGTCTTTG |                     |                             |            |             |                  |                                     |
| 54      | TerW-1              | TTCTCTACCGCTTCACTT | <i>terW</i> (Z1603) | 94°C, 60 s                  | 55°C, 60 s | 72°C, 60 s  | 250              | 35047-35064<br>35296-35279          |
|         | TerW-2              | TCAAATACAGCAAGGCAG |                     |                             |            |             |                  |                                     |
| 55      | Z1604-3             | GTGGTGGGCATAGTTTTC | Z1604               | 94°C, 30 s                  | 54°C, 60 s | 72°C, 60 s  | 490              | 35753-35770<br>36242-36225          |
|         | Z1604-4             | CGAGAGCGAAGGCATTAG |                     |                             |            |             |                  |                                     |
| 56      | Z1605-3             | GCGGTCAGGGCAAAATCA | Z1605               | 94°C, 30 s                  | 58°C, 60 s | 72°C, 60 s  | 476              | 37024-37041<br>37499-37482          |
|         | Z1605-4             | ATCCCCGTCGCCCTCAA  |                     |                             |            |             |                  |                                     |
| 57      | Z1604-1             | GGTATTCTCACGCTCCAC | Z1604-Z1605         | 94°C, 30 s                  | 55°C, 60 s | 72°C, 60 s  | 444              | 36119-36136<br>36562-36545          |
|         | Z1605-2             | GGGACCTATGCCAATCTG |                     |                             |            |             |                  |                                     |
| 58      | Z1606-1             | ACGGTATCGGCAAGCATC | Z1606               | 94°C, 30 s                  | 56°C, 60 s | 72°C, 60 s  | 402              | 37986-38003<br>38387-38370          |
|         | Z1606-2             | TGACATGGGGAAAACCTC |                     |                             |            |             |                  |                                     |

| PCR No. | Primer <sup>a</sup> | Sequence (5' - 3')                              | Target                            | PCR conditions <sup>b</sup> |            |             | PCR product (bp) | Position of the primer <sup>c</sup> |
|---------|---------------------|-------------------------------------------------|-----------------------------------|-----------------------------|------------|-------------|------------------|-------------------------------------|
|         |                     |                                                 |                                   | Denaturing                  | Annealing  | Extension   |                  |                                     |
| 59      | Z1607-3<br>Z1607-4  | GACTGCCAGCCCTTTCTC<br>ATCGCACCCCTGAATCCAC       | Z1607                             | 94°C, 30 s                  | 56°C, 60 s | 72°C, 60 s  | 500              | 38898-38915<br>39397-39380          |
| 60      | Z1605-1<br>Z1607-2  | CTCCAGGCAAATCACCAG<br>GCTGGCTGCTTGAAAAC         | Z1605-Z1607                       | 94°C, 30 s                  | 56°C, 60 s | 72°C, 120 s | 1,376            | 37521-37538<br>38896-38879          |
| 61      | Z1608-1<br>Z1608-2  | CCCCTTGTGGACGGAGAC<br>TACTCGGCAGGCACATTC        | Z1608                             | 94°C, 30 s                  | 57°C, 60 s | 72°C, 60 s  | 668              | 39817-39834<br>40484-40467          |
| 62      | Z1609-3<br>Z1609-4  | GCTTCCTTCGTTTACCAG<br>AACCATTCAGACCTACGG        | Z1609                             | 94°C, 30 s                  | 54°C, 60 s | 72°C, 60 s  | 550              | 40954-40971<br>41503-41486          |
| 63      | Z1607-1<br>Z1609-2  | AAAGGAAATGGCGGACTC<br>CCTTCCTGGGTTATTTGC        | Z1607-Z1609                       | 94°C, 30 s                  | 56°C, 60 s | 72°C, 90 s  | 1,135            | 39664-39681<br>40798-40781          |
| 64      | Z1609-1<br>Z1610-2  | GTGGATGCCGTAGGTCTG<br>ACCGAGACCGAAATGAAG        | Z1609-Z1610                       | 94°C, 30 s                  | 50°C, 60 s | 72°C, 60 s  | 631              | 41479-41496<br>42109-42092          |
| 65      | TerZ1<br>TerA2      | GACGGTATCACTCAGCAAAGAATC<br>TGGCGGGTCAGTTCGTCAC | <i>terZ-terB</i><br>(Z1610-Z1612) | 94°C, 30 s                  | 58°C, 60 s | 72°C, 150 s | 1,800            | 42052-42075<br>43851-43833          |
| 66      | TerA1<br>TerB2      | TATCGTTTCAGCGGTTATTC<br>TCGCAACGGCAATACCAACACG  | <i>terZ-terB</i><br>(Z1610-Z1612) | 94°C, 30 s                  | 56°C, 60 s | 72°C, 120 s | 1,568            | 42586-42605<br>44153-44132          |
| 67      | TerB1<br>TerC2      | AGGCCGTGACGAACTGACC<br>GAAACACTCATAAAATAACCTCTT | <i>terB-terD</i><br>(Z1612-Z1614) | 94°C, 30 s                  | 55°C, 60 s | 72°C, 120 s | 1,540            | 43828-43846<br>45367-45344          |
| 68      | TerC1<br>TerD2      | TCCTGGCGCTGAAAGAT<br>CCGAACAGCATGGCAGTCT        | <i>terB-terD</i><br>(Z1612-Z1614) | 94°C, 30 s                  | 56°C, 60 s | 72°C, 150 s | 1,742            | 44088-44104<br>45829-45811          |

| PCR No. | Primer <sup>a</sup> | Sequence (5' - 3')                              | Target                            | PCR conditions <sup>b</sup> |            |             | PCR product (bp) | Position of the primer <sup>c</sup> |
|---------|---------------------|-------------------------------------------------|-----------------------------------|-----------------------------|------------|-------------|------------------|-------------------------------------|
|         |                     |                                                 |                                   | Denaturing                  | Annealing  | Extension   |                  |                                     |
| 69      | TerD1<br>TerE2      | AGTAAAGCAGCTCCGTCAAT<br>CCGTCCCGTTGTCGTTGTTGTAA | <i>terD-terE</i><br>(Z1614-Z1615) | 94°C, 30 s                  | 55°C, 60 s | 72°C, 90 s  | 1,023            | 45396-45415<br>46418-46396          |
| 70      | TerE1<br>TerF2      | TAAAAGGCGGCAACGTATCTCTGA<br>CAATGACAACGGTGATCG  | <i>terE-terF</i><br>(Z1615-Z1616) | 94°C, 30 s                  | 56°C, 60 s | 72°C, 120 s | 1,267            | 46020-46043<br>47286-47269          |
| 71      | Z1616-1<br>Z1617-2  | GCATTGAGATAGCACTGG<br>GTGAATGCGAAACTGAAC        | Z1616-Z1617                       | 94°C, 30 s                  | 53°C, 60 s | 72°C, 90 s  | 1,058            | 47221-47238<br>48278-48261          |
| 72      | Iha-I<br>Iha-II     | CAGTTCAGTTTCGCATTCACC<br>GTATGGCTCTGATGCGATG    | <i>iha</i> (Z1617)                | 94°C, 30 s                  | 56°C, 60 s | 72°C, 90 s  | 1,305            | 48259-48279<br>49563-49545          |
| 73      | Z1617-1<br>Z1619-2  | GACAGGGAATGACTACGG<br>TGTAAGCGGGGAGTAAC         | Z1617-Z1619                       | 94°C, 30 s                  | 51°C, 60 s | 72°C, 60 s  | 785              | 49952-49969<br>50736-50719          |
| 74      | Z1619-1<br>Z1620-2  | AAAACCTTTGACGCATAC<br>TAGCCATACGACTTTACC        | Z1619-Z1620                       | 94°C, 30 s                  | 48°C, 60 s | 72°C, 60 s  | 764              | 50840-50857<br>51603-51586          |
| 75      | Z1620-3<br>Z1622-2  | AAAGTCGTATGGCTATGG<br>ACATTCGTCCTCAACAGAG       | Z1620-Z1622                       | 94°C, 30 s                  | 49°C, 60 s | 72°C, 60 s  | 841              | 51589-51606<br>52429-52412          |
| 76      | Z1623-1<br>Z1623-2  | AGATGGATTTGCTGGAC<br>ATGACATTGTAATAAGGC         | Z1623                             | 94°C, 30 s                  | 46°C, 60 s | 72°C, 40 s  | 112              | 53166-53183<br>53277-53260          |
| 77      | Z1624-1<br>Z1624-2  | AGTGGAAAATAGGTTAGG<br>AAAATAAAAAGGCTGGAG        | Z1624                             | 94°C, 30 s                  | 48°C, 60 s | 72°C, 40 s  | 104              | 53491-53508<br>53594-53577          |
| 78      | Z1622-1<br>Z1625-2  | ACACAGGAGCCAGAATAC<br>TAAATCAGGCAAACCAG         | Z1622-Z1625                       | 94°C, 30 s                  | 51°C, 60 s | 72°C, 120 s | 1,438            | 52528-52545<br>53965-53948          |



| PCR No. | Primer <sup>a</sup> | Sequence (5' - 3')                        | Target      | PCR conditions <sup>b</sup> |            |             | PCR product (bp) | Position of the primer <sup>c</sup> |
|---------|---------------------|-------------------------------------------|-------------|-----------------------------|------------|-------------|------------------|-------------------------------------|
|         |                     |                                           |             | Denaturing                  | Annealing  | Extension   |                  |                                     |
| 79      | Z1625-1<br>Z1626-2  | AGACTCTCGTTGCTGGTG<br>CGGGATACCAGGGATTAC  | Z1625-Z1626 | 94°C, 30 s                  | 53°C, 60 s | 72°C, 60 s  | 639              | 54043-54060<br>54681-54664          |
| 80      | Z1627-1<br>Z1627-2  | ACAACAAGCCACGACAGC<br>TGCTCCACTTCACTTTTG  | Z1627       | 94°C, 30 s                  | 51°C, 60 s | 72°C, 40 s  | 179              | 54773-54790<br>54951-54934          |
| 81      | Z1628-1<br>Z1628-2  | GCGCTGGTATTGTGGAAC<br>TCAGGAAGGGATAACAAC  | Z1628       | 94°C, 30 s                  | 51°C, 60 s | 72°C, 40 s  | 105              | 55060-55077<br>55164-55147          |
| 82      | Z1629-1<br>Z1629-2  | TACCCATTGATTTCTCTG<br>TATATTTAGCAGCAACCA  | Z1629       | 94°C, 30 s                  | 49°C, 60 s | 72°C, 60 s  | 313              | 55739-55756<br>56051-56034          |
| 83      | Z1626-1<br>Z1630-2  | ATCCCTGGTATCCCGTAA<br>TTTCCTTTACAGCACCTC  | Z1626-Z1630 | 94°C, 30 s                  | 51°C, 60 s | 72°C, 120 s | 1,612            | 54667-54684<br>56278-56261          |
| 84      | Z1630-1<br>Z1631-2  | GATTGTGTTTGGCGAAGG<br>CGCCTCCGAAAGATGTAA  | Z1630-Z1631 | 94°C, 30 s                  | 52°C, 60 s | 72°C, 60 s  | 603              | 56574-56591<br>57176-57159          |
| 85      | Z1632-1<br>Z1632-2  | AGATAATGCCCGATGACC<br>CGGGCAGTGATGTGATTG  | Z1632       | 94°C, 30 s                  | 55°C, 60 s | 72°C, 60 s  | 385              | 57255-57272<br>57639-57622          |
| 86      | Z1631-1<br>Z1633-2  | TAAAGAACCGACTCCAAG<br>TTGTTTTCCCTCATTGTTC | Z1631-Z1633 | 94°C, 30 s                  | 51°C, 60 s | 72°C, 90 s  | 1,094            | 57133-57150<br>58226-58209          |
| 87      | Z1634-1<br>Z1634-2  | GTTGGCATTTCCTTACAC<br>CTGCGACATAAAGGACTG  | Z1634       | 94°C, 30 s                  | 53°C, 60 s | 72°C, 60 s  | 403              | 59167-59184<br>59569-59552          |
| 88      | Z1633-1<br>Z1635-2  | AAGGTGGAAGTGCTGAAA<br>TCGTTCCGTTCTGTAAAA  | Z1633-Z1635 | 94°C, 30 s                  | 51°C, 60 s | 72°C, 90 s  | 1,166            | 58572-58589<br>59737-59720          |

| PCR No. | Primer <sup>a</sup> | Sequence (5' - 3')  | Target      | PCR conditions <sup>b</sup> |            |            | PCR product (bp) | Position of the primer <sup>c</sup> |
|---------|---------------------|---------------------|-------------|-----------------------------|------------|------------|------------------|-------------------------------------|
|         |                     |                     |             | Denaturing                  | Annealing  | Extension  |                  |                                     |
| 89      | Z1635-1             | TGTTTCAGGTTTGGCAGTC | Z1635-Z1636 | 94°C, 30 s                  | 54°C, 60 s | 72°C, 60 s | 450              | 60166-60183<br>60615-60598          |
|         | Z1636-2             | ACAAGCCCAGAAAACCAC  |             |                             |            |            |                  |                                     |
| 90      | Z1637-1             | TTTATTCTGTTTCTTCCC  | Z1637       | 94°C, 30 s                  | 50°C, 60 s | 72°C, 40 s | 175              | 60686-60703<br>60860-60843          |
|         | Z1637-2             | TTACCGAAAGTCAATCAG  |             |                             |            |            |                  |                                     |
| 91      | Z1638-3             | AAAATCAGCCACCCACAG  | Z1638       | 94°C, 30 s                  | 56°C, 60 s | 72°C, 60 s | 316              | 61952-61969<br>62267-62250          |
|         | Z1638-4             | GCAACAGCGACATCATCC  |             |                             |            |            |                  |                                     |
| 92      | Z1636-1             | GTTTTCTGGGCTTGTCTC  | Z1636-Z1638 | 94°C, 30 s                  | 51°C, 60 s | 72°C, 90 s | 929              | 60601-60618<br>61529-61512          |
|         | Z1638-2             | GGCAGAAGCAGAAAAAGC  |             |                             |            |            |                  |                                     |
| 93      | Z1639-1             | AACTCCGCCTTCGAAAA   | Z1639       | 94°C, 30 s                  | 57°C, 60 s | 72°C, 60 s | 290              | 62381-62398<br>62670-62653          |
|         | Z1639-2             | CGTTTTTCCCCGAGGTC   |             |                             |            |            |                  |                                     |
| 94      | Z1640-1             | GCTGATGCGTTACCACAC  | Z1640       | 94°C, 30 s                  | 54°C, 60 s | 72°C, 60 s | 504              | 63088-63105<br>63591-63574          |
|         | Z1640-2             | ACGATTTGACAGGCTTTG  |             |                             |            |            |                  |                                     |
| 95      | Z1638-1             | ATGATGTCGCTGTTGCTG  | Z1638-Z1640 | 94°C, 30 s                  | 55°C, 60 s | 72°C, 60 s | 680              | 62252-62269<br>62931-62914          |
|         | Z1640-4             | TGCTTCATCTCCGCTACG  |             |                             |            |            |                  |                                     |
| 96      | Z1641-1             | GAAATGACGACAGAGAGG  | Z1641       | 94°C, 30 s                  | 50°C, 60 s | 72°C, 60 s | 429              | 64220-64237<br>64648-64631          |
|         | Z1641-2             | CGTTTTTACTCTGTCCTG  |             |                             |            |            |                  |                                     |
| 97      | Z1642-3             | GAAAAGATGGACAAACAG  | Z1642       | 94°C, 30 s                  | 49°C, 60 s | 72°C, 60 s | 370              | 64863-64880<br>65232-65215          |
|         | Z1642-4             | TGTTTCTGAATCCAATCC  |             |                             |            |            |                  |                                     |
| 98      | Z1640-3             | GTTTGTGGCTGGTGTCTG  | Z1640-Z1642 | 94°C, 30 s                  | 51°C, 60 s | 72°C, 90 s | 986              | 63786-63803<br>64771-64754          |
|         | Z1642-2             | TGTGTTTTACCTGTTCCA  |             |                             |            |            |                  |                                     |

| PCR No. | Primer <sup>a</sup> | Sequence (5' - 3')                       | Target      | PCR conditions <sup>b</sup> |            |            | PCR product (bp) | Position of the primer <sup>c</sup> |
|---------|---------------------|------------------------------------------|-------------|-----------------------------|------------|------------|------------------|-------------------------------------|
|         |                     |                                          |             | Denaturing                  | Annealing  | Extension  |                  |                                     |
| 99      | Z1643-1<br>Z1643-2  | CTTTATGGGGCTGGTGTC<br>GCTCCCCAGGTCATTCTC | Z1643       | 94°C, 30 s                  | 55°C, 60 s | 72°C, 60 s | 544              | 67869-67886<br>68412-68395          |
| 100     | Z1642-1<br>Z1643-4  | GGTTATTGAAGTGGATGG<br>CACAAGATGGAAAAGCAC | Z1642-Z1643 | 94°C, 30 s                  | 50°C, 60 s | 72°C, 60 s | 821              | 66665-66682<br>67485-67468          |
| 101     | Z1644-1<br>Z1644-2  | GGTGAGAAGAACTGCTG<br>CCGCTAATCTGTTTCAAT  | Z1644       | 94°C, 30 s                  | 53°C, 60 s | 72°C, 60 s | 368              | 68766-68783<br>69133-69116          |
| 102     | Z1645-1<br>Z1645-2  | GTCATCCATCAACCAGTG<br>TGTTATTCGCTGTTTCTG | Z1645       | 94°C, 30 s                  | 50°C, 60 s | 72°C, 60 s | 371              | 69702-69719<br>70072-70055          |
| 103     | Z1643-3<br>Z1645-4  | GCGTATGAAAGAAAGGAG<br>TTCATCGCATAAAAGTTG | Z1643-Z1645 | 94°C, 30 s                  | 53°C, 60 s | 72°C, 90 s | 1,091            | 68526-68543<br>69616-69599          |
| 104     | Z1646-1<br>Z1646-2  | GATGAAAGTGAATGGTGT<br>TTGACAAGACGACGTTAG | Z1646       | 94°C, 30 s                  | 48°C, 60 s | 72°C, 40 s | 151              | 70248-70265<br>70398-70381          |
| 105     | Z1647-3<br>Z1647-4  | CCAGCCTTCCAGCAATC<br>TACGGCGGTCAGTTTACG  | Z1647       | 94°C, 30 s                  | 51°C, 60 s | 72°C, 60 s | 169              | 70970-70987<br>71138-71121          |
| 106     | Z1645-3<br>Z1647-2  | ATTTTATGAGCCCGATGC<br>CGGCAGAAGCAGAAAAG  | Z1645-Z1647 | 94°C, 30 s                  | 53°C, 60 s | 72°C, 60 s | 880              | 70078-70095<br>70957-70940          |
| 107     | Z1648-1<br>Z1648-2  | TACAGGACTGGCGAAAAG<br>TCTGAGTGGAAGTGGATA | Z1648       | 94°C, 30 s                  | 51°C, 60 s | 72°C, 60 s | 300              | 71208-71225<br>71507-71490          |
| 108     | Z1649-1<br>Z1649-2  | GCCGCCTCATCATTATCC<br>ACGATGAAAACATGACG  | Z1649       | 94°C, 30 s                  | 47°C, 60 s | 72°C, 40 s | 94               | 71966-71983<br>72059-72042          |

| PCR No. | Primer <sup>a</sup> | Sequence (5' - 3')  | Target            | PCR conditions <sup>b</sup> |            |             | PCR product (bp) | Position of the primer <sup>c</sup> |
|---------|---------------------|---------------------|-------------------|-----------------------------|------------|-------------|------------------|-------------------------------------|
|         |                     |                     |                   | Denaturing                  | Annealing  | Extension   |                  |                                     |
| 109     | Z1650-1             | TCGCTTTCCCGTCACATC  | Z1650             | 94°C, 30 s                  | 58°C, 60 s | 72°C, 60 s  | 665              | 72494-72511<br>73158-73141          |
|         | Z1650-2             | TGCCCCCAGACAGATTCC  |                   |                             |            |             |                  |                                     |
| 110     | Z1647-1             | TAAACTGACCGCCGTATG  | Z1647-Z1650       | 94°C, 30 s                  | 52°C, 60 s | 72°C, 120 s | 1,371            | 71123-71140<br>72493-72476          |
|         | Z1650-4             | GTAAGGCAGGGAGGAGAG  |                   |                             |            |             |                  |                                     |
| 111     | Z1651-1             | ACCACCACGAACCTCACC  | Z1651<br>(AIDA-I) | 94°C, 30 s                  | 57°C, 60 s | 72°C, 60 s  | 532              | 75211-75228<br>75742-75725          |
|         | Z1651-2             | GACGGACGAAGCCATAGC  |                   |                             |            |             |                  |                                     |
| 112     | Z1650-3             | AAACAGATGCGGTATTCC  | Z1650-Z1651       | 94°C, 30 s                  | 55°C, 60 s | 72°C, 60 s  | 837              | 72978-72995<br>73814-73797          |
|         | Z1651-4             | ACAGCAGCAAGAGACAGC  |                   |                             |            |             |                  |                                     |
| 113     | Z1652-1             | TGGGAAAACCTATGACGAG | Z1652-Z1654       | 94°C, 30 s                  | 54°C, 60 s | 72°C, 120 s | 1,369            | 78684-78701<br>80052-80035          |
|         | Z1654-4             | AATGCTGGTCCCTGAAAC  |                   |                             |            |             |                  |                                     |
| 114     | Z1653-1             | CTGGCTGACGGAGATGAC  | Z1653             | 94°C, 30 s                  | 55°C, 60 s | 72°C, 60 s  | 545              | 79261-79278<br>79805-79788          |
|         | Z1653-2             | GATGCTGCTCTTCACTGC  |                   |                             |            |             |                  |                                     |
| 115     | Z1654-1             | CGTGCTGAACTGGGTGTC  | Z1654             | 94°C, 30 s                  | 57°C, 60 s | 72°C, 60 s  | 487              | 80440-80457<br>80926-80909          |
|         | Z1654-2             | GCAATACCGCCTCTGACC  |                   |                             |            |             |                  |                                     |
| 116     | Z1654-3             | CGGAAGAGGCAGATTTGG  | Z1654-Z1656       | 94°C, 30 s                  | 56°C, 60 s | 72°C, 120 s | 1,472            | 80945-80961<br>82416-82399          |
|         | Z1656-2             | GAAGACACGGGGCTCCAG  |                   |                             |            |             |                  |                                     |
| 117     | Z1657-2             | ACACCCAGTAAGGCAGAC  | Z1657-Z1658       | 94°C, 30 s                  | 54°C, 60 s | 72°C, 60 s  | 939              | 83086-83103<br>84024-84007          |
|         | Z1658-2             | GTGCTGGTGTTCGGATAAA |                   |                             |            |             |                  |                                     |
| 118     | Z1658-1             | GCCTTTCCGCTGCTGATG  | Z1658-Z1660       | 94°C, 30 s                  | 57°C, 60 s | 72°C, 60 s  | 578              | 83859-83876<br>84436-84419          |
|         | Z1660-2             | CGACGATTGCTGGGAAGG  |                   |                             |            |             |                  |                                     |

| PCR No. | Primer <sup>a</sup>  | Sequence (5' - 3')                               | Target                                                                            | PCR conditions <sup>b</sup> |            |            | PCR product (bp) | Position of the primer <sup>c</sup>          |
|---------|----------------------|--------------------------------------------------|-----------------------------------------------------------------------------------|-----------------------------|------------|------------|------------------|----------------------------------------------|
|         |                      |                                                  |                                                                                   | Denaturing                  | Annealing  | Extension  |                  |                                              |
| 119     | Z1660-1<br>Z1662-2   | ATGATGTCGCTGTTGCTG<br>TAGCCGTTATCGCAGACC         | Z1660-Z1662                                                                       | 94°C, 30 s                  | 55°C, 60 s | 72°C, 60 s | 779              | 85124-85141<br>85902-85885                   |
| 120     | Z1662-1<br>Z1663-2   | GCTACTCCCTTCGTGTTG<br>CGATACAGGGCAACAGTG         | Z1662-Z1663                                                                       | 94°C, 30 s                  | 54°C, 60 s | 72°C, 60 s | 512              | 85899-85916<br>86410-86393                   |
| 121     | Z1664-1<br>Z1664-2   | CTGGCTGAAATCTCGGTGCTG<br>GATCACCCCTCGCTCAAACAC   | Z1226, Z1664 <sup>f</sup>                                                         | 94°C, 30 s                  | 57°C, 60 s | 72°C, 60 s | 327              | 86689-86709<br>87015-86995                   |
| 122     | LG-1<br>SerWX-2      | AAATCAGCGAAGCGAACA<br>TGTCCGAGTGGCTGAAGG         | Z1226/Z1664 -<br><i>serW/serX</i>                                                 | 94°C, 30 s                  | 54°C, 60 s | 72°C, 60 s | 694              | 86936-86953<br>25-8 <sup>g</sup>             |
| 123     | LG43<br>InfA-r       | GTAACCAATCCCCGACAACC<br>CCTGACGGGCGACAAAGTGAC    | Z1226- <i>infA</i><br>(right junction of OI<br>43 and the core<br>genome)         | 94°C, 30 s                  | 55°C, 60 s | 72°C, 60 s | 781              | 87188-87208<br>79-59 <sup>h</sup>            |
| 124     | OI 48 CI-F<br>serX-R | TTTGCCAGTATGCTCAAAGA<br>GGTATCGAACGTTGGGTGAT     | Z1664 downstr- <i>ycdW</i><br>(right junction of OI<br>48 and the core<br>genome) | 95°C, 45 s                  | 58°C, 45 s | 72°C, 90 s | 505              | 87420-87401<br>75-56 <sup>i</sup>            |
| 125     | SerW-3<br>SerW-4     | CGCTGGATAAAGAGAAAAATG<br>GCAAAAACACTACATCCGCATCC | <i>serW</i> intact                                                                | 94°C, 30 s                  | 54°C, 60 s | 72°C, 90 s | 859              | 2201-2221 <sup>d</sup><br>98-78 <sup>h</sup> |
| 126     | serX-F<br>serX-R     | TGTCGATTCTCTGGCATAA<br>GGTATCGAACGTTGGGTGAT      | <i>serX</i> intact                                                                | 95°C, 45 s                  | 60°C, 45 s | 72°C, 90 s | 624              | 913-932 <sup>e</sup><br>75-56 <sup>i</sup>   |

| PCR No. | Primer <sup>a</sup>                                                 | Sequence (5' - 3')                                                                                                                                                 | Target                                            | PCR conditions <sup>b</sup>     |                                              |                                 | PCR product (bp)                | Position of the primer <sup>c</sup>                  |
|---------|---------------------------------------------------------------------|--------------------------------------------------------------------------------------------------------------------------------------------------------------------|---------------------------------------------------|---------------------------------|----------------------------------------------|---------------------------------|---------------------------------|------------------------------------------------------|
|         |                                                                     |                                                                                                                                                                    |                                                   | Denaturing                      | Annealing                                    | Extension                       |                                 |                                                      |
| 127     | Z1565F<br>Z1638R                                                    | TGAAAGTCTGGCGATGAGTG<br>GTACTACCGTCAGCCGAAA                                                                                                                        | internal deletion of OI 48 in strain 134S         | 95°C, 45 s                      | 60°C, 30 s                                   | 68°C, 240 s                     | 2,017                           | 6257-6276<br>62046-62027                             |
| 128     | Z1567F<br>Z1648R                                                    | ATGCTGGCGGGATATTACTG<br>GGATTTTCCAGCGTCATGTT                                                                                                                       | internal deletion of OI 48 in strains 81S/154S    | 95°C, 45 s                      | 60°C, 30 s                                   | 68°C, 240 s                     | 4,825/<br>2,379                 | 7831-7850<br>71571-71552                             |
| 129     | 134S-F2<br>134S-R2                                                  | CAGAGTTGTACCGTTATTGAGG<br>CCATTTTCGTAATTGGGATTAGC                                                                                                                  | walking primer for sequencing of PCR product 127  | -<br>-                          | 59°C<br>59°C                                 | -<br>-                          | -<br>-                          | n.a. <sup>j</sup><br>n.a.                            |
| 130     | 81S-F2<br>81S-F3<br>81S-F4<br>81S-R2<br>81S-R3<br>81S-R4<br>154S-R2 | ACGTTAGTGTGGCCAGTTCC<br>ATGATGTCGCTGTTGCTGAC<br>GCCCTAATTATCCTCCCGAAT<br>ACCGGCCAGTCTGCTATG<br>TGCGGTCATCACGAACATAC<br>ATACGGCGGGAGACTTTTTC<br>GTTCCATTGCCCAAAGATT | walking primer for sequencing of PCR products 128 | -<br>-<br>-<br>-<br>-<br>-<br>- | 59°C<br>59°C<br>59°C<br>59°C<br>59°C<br>59°C | -<br>-<br>-<br>-<br>-<br>-<br>- | -<br>-<br>-<br>-<br>-<br>-<br>- | n.a.<br>n.a.<br>n.a.<br>n.a.<br>n.a.<br>n.a.<br>n.a. |
| 131     | RecAF<br>RecAR                                                      | CCGGTAAAACCACGCTGAC<br>CCTGACCGATCTTCTCACCT                                                                                                                        | RecA                                              | 95°C, 30 s                      | 54°C, 45 s                                   | 72°C, 60 s                      | 693                             | 212-230 <sup>k</sup><br>904-885 <sup>k</sup>         |
| 132     | TerE1<br>TerE2                                                      | TAAAAGGCGGCAACGTATCTCTGA<br>CCGTCCCGTTGTCGTTGTTGTAA                                                                                                                | TerE                                              | 95°C, 30 s                      | 58°C, 45 s                                   | 72°C, 60 s                      | 399                             | 46020-46043<br>46418-46396                           |

| PCR No. | Primer <sup>a</sup> | Sequence (5' - 3')    | Target                                         | PCR conditions <sup>b</sup> |            |            | PCR product (bp) | Position of the primer <sup>c</sup> |
|---------|---------------------|-----------------------|------------------------------------------------|-----------------------------|------------|------------|------------------|-------------------------------------|
|         |                     |                       |                                                | Denaturing                  | Annealing  | Extension  |                  |                                     |
| 133     | Z1567F              | ATGCTGGCGGGATATTACTG  | 5' junction of internal deletion in strain 81L | 94°C, 30 s                  | 53°C, 30 s | 68°C, 5 m  | 3,464            | 7831-7850                           |
|         | Z1568-4             | ATCGCAGAAAATGAAACC    |                                                |                             |            |            |                  | 9981-9964                           |
|         | 81S-F2              | ACGTTAGTGTGGCCAGTTCC  | walking primer for                             | -                           | 59°C       | -          | -                | n.a.                                |
|         | 81S-F3              | ATGATGTCGCTGTTGCTGAC  | sequencing                                     | -                           | 59°C       | -          | -                | n.a.                                |
|         | Z1568-R1            | ACCTGAGGTAATTGCGCTTT  |                                                | -                           | 59°C       | -          | -                | 9360-9341                           |
|         | Z1568-R2            | CCAGCGCAGCAGGTACAC    |                                                | -                           | 59°C       | -          | -                | 8846-8829                           |
| 134     | Z1637F              | CGCTGATTGACTTTCGGTAAT | 3' junction of internal deletion in strain 81L | 94°C, 30 s                  | 61°C, 30 s | 68°C, 10 m | ~6,200           | 60841-60861                         |
|         | Z1648R              | GGATTTTCCAGCGTCATGTT  |                                                |                             |            |            |                  | 71571-71552                         |
|         | Z1637/38F           | ATTCTGGTACCGGTTGATGC  | walking primer for                             | -                           | 59°C       | -          | -                | 61342-61361                         |
|         | 81S-R2              | ACCGGCCAGTCTGCTATG    | sequencing <sup>1</sup>                        | -                           | 59°C       | -          | -                | n.a.                                |
|         | 81S-R3              | TGCGGTCATCACGAACATAC  |                                                | -                           | 59°C       | -          | -                | n.a.                                |
|         | 81S-R4              | ATACGGCGGGAGACTTTTTC  |                                                | -                           | 59°C       | -          | -                | n.a.                                |
|         | 81S-R5              | CGGAACGTTACCTCACAGC   |                                                | -                           | 59°C       | -          | -                | n.a.                                |

| PCR No. | Primer <sup>a</sup>     | Sequence (5' - 3')      | Target                                          | PCR conditions <sup>b</sup> |            |           | PCR product (bp) | Position of the primer <sup>c</sup> |
|---------|-------------------------|-------------------------|-------------------------------------------------|-----------------------------|------------|-----------|------------------|-------------------------------------|
|         |                         |                         |                                                 | Denaturing                  | Annealing  | Extension |                  |                                     |
| 135     | Z1565F                  | TGAAAGTCTGGCGATGAGTG    | 5' junction of internal deletion in strain 134L | 95°C, 30 s                  | 45°C, 30 s | 68°C, 5 m | 3197             | 6257-6276<br>8140-8123              |
|         | Z1567-2                 | TACGCCTCAGAATAATAC      |                                                 |                             |            |           |                  |                                     |
|         | 134S-F2                 | CAGAGTTGTACCGGTTATTGAGG | walking primer for sequencing                   | -                           | 59°C       | -         | -                | n.a.                                |
|         | 134L-F1                 | GTGCTGCTGGTTACCTCGTT    |                                                 | -                           | 59°C       | -         | -                | n.a.                                |
|         | ECs5244-2               | CCAGCCTTCCCAGCAATCGTC   |                                                 | -                           | 59°C       | -         | -                | n.a.                                |
|         | 134L-R1                 | CTGGAAAGTCAGGGCGAATA    |                                                 | -                           | 59°C       | -         | -                | n.a.                                |
|         | ECs5244-1               | TCAGCAACAGCGACATCATCC   |                                                 | -                           | 59°C       | -         | -                | n.a.                                |
| 134S-R2 | CCATTTTCGTAATTGGGATTAGC | -                       | 59°C                                            | -                           | -          | n.a.      |                  |                                     |
| 136     | Z1636-1                 | GTTTTCTGGGCTTGTCTC      | 3' junction of internal deletion in strain 134L | 95°C, 30 s                  | 53°C, 30 s | 68°C, 5 m | 1,446            | 60601-60618<br>31082-31063          |
|         | Z1638R                  | GGATTTTCCAGCGTCATGTT    |                                                 |                             |            |           |                  |                                     |
|         | Z1638-2                 | GGCAGAAGCAGAAAAAGC      | walking primer for sequencing                   | -                           | 52°C       | -         | -                | 61529-61512                         |



| PCR No.   | Primer <sup>a</sup>   | Sequence (5' - 3')    | Target                                          | PCR conditions <sup>b</sup> |            |            | PCR product (bp) | Position of the primer <sup>c</sup> |
|-----------|-----------------------|-----------------------|-------------------------------------------------|-----------------------------|------------|------------|------------------|-------------------------------------|
|           |                       |                       |                                                 | Denaturing                  | Annealing  | Extension  |                  |                                     |
| 137       | Z1567F                | ATGCTGGCGGGATATTACTG  | 5' junction of internal deletion in strain 154L | 94°C, 30 s                  | 61°C, 30 s | 68°C, 10 m | 3,213            | 7831-7850                           |
|           | Z1574R                | CGACTGCTGCACCTTCATAA  |                                                 |                             |            |            |                  | 15403-15384                         |
|           | ECs5244-2             | CCAGCCTTCCCAGCAATCGTC | walking primer for sequencing                   | -                           | 59°C       | -          | -                | n.a.                                |
|           | 81S-F3                | ATGATGTCGCTGTTGCTGAC  |                                                 | -                           | 59°C       | -          | -                | n.a.                                |
|           | Z1573R                | ACAGGGCTTTACCTGTCAGC  |                                                 | -                           | 59°C       | -          | -                | 14772-14753                         |
|           | Z1573-2               | CCGCTCATCACTTTGTTT    |                                                 | -                           | 50°C       | -          | -                | 14384-14367                         |
|           | ECs5243-1             | GCGATTCGTATGGTTCTGGA  |                                                 | -                           | 59°C       | -          | -                | n.a.                                |
| ECs5244-1 | TCAGCAACAGCGACATCATCC | -                     | 59°C                                            | -                           | -          | n.a.       |                  |                                     |

| PCR No. | Primer <sup>a</sup>  | Sequence (5' - 3')    | Target                                          | PCR conditions <sup>b</sup> |            |            | PCR product (bp) | Position of the primer <sup>c</sup> |
|---------|----------------------|-----------------------|-------------------------------------------------|-----------------------------|------------|------------|------------------|-------------------------------------|
|         |                      |                       |                                                 | Denaturing                  | Annealing  | Extension  |                  |                                     |
| 138     | Z1640F               | CTGCTGGATTTACGGGACAT  | 3' junction of internal deletion in strain 154L | 94°C, 30 s                  | 60°C, 30 s | 68°C, 10 m | 6,424            | 63370-63389                         |
|         | Z1648R               | GGATTTTCCAGCGTCATGTT  |                                                 |                             |            |            |                  | 71571-71552                         |
|         | Z1640-3              | GTTTGTGGCTGGTGTCTG    | walking primer for                              | -                           | 54°C       | -          | -                | 63786-63803                         |
|         | Z1641-1              | GAAATGACGACAGAGAGG    | sequencing                                      | -                           | 50°C       | -          | -                | 64220-64237                         |
|         | Z1642-3              | GAAAAGATGGACAAACAG    |                                                 | -                           | 49°C       | -          | -                | 64863-64880                         |
|         | Z1642F               | GAGAAGGCTGGCGCTATTTA  |                                                 | -                           | 59°C       | -          | -                | 65291-65310                         |
|         | Z1642F2              | TCAGGAACATGGTGCCAGTA  |                                                 | -                           | 59°C       | -          | -                | 65800-65819                         |
|         | ECs5244-2            | CCAGCCTTCCCAGCAATCGTC |                                                 | -                           | 59°C       | -          | -                | n.a.                                |
|         | 81S-F3               | ATGATGTCGCTGTTGCTGAC  |                                                 | -                           | 59°C       | -          | -                | n.a.                                |
|         | ECs5243-1            | GCGATTCGTATGGTTCTGGA  |                                                 | -                           | 59°C       | -          | -                | n.a.                                |
|         | ECs5244-1            | TCAGCAACAGCGACATCATCC |                                                 | -                           | 59°C       | -          | -                | n.a.                                |
|         | Z1647R               | AAACCGTGCAGAAGTGGAAC  |                                                 | -                           | 59°C       | -          | -                | 71046-71027                         |
|         | Z1642/43R            | CACACCTGGAAAATCCATGC  |                                                 | -                           | 59°C       | -          | -                | 67171-67152                         |
| Z1642R  | AATGGAGTCTTCCCGACCTT |                       | -                                               | 59°C                        | -          | -          | 66661-66642      |                                     |

a. Primers were derived from the sequence of O island (OI) 48 of *E. coli* O157:H7 strain EDL933 (GenBank accession number AE005174; genomic position 1454242 to 1541789), which is identical in its nucleotide sequence to OI 43 of EDL933, and from the genes flanking OI 48 (*ycdU*, *serX*, *ycdW*) and OI 43 (*clpA*, *serW*, *infA*) in the genome of strain EDL933.

b. All PCRs included 30 cycles as indicated, preceded by denaturation (94°C, 5 min) and followed by a final extension (72°C, 5 min).

- c. Positions of PCR primers within the sequence of OI 48 of *E. coli* O157:H7 strain EDL933 are indicated unless specified otherwise; position of the first nucleotide of OI 48 (1454242) is considered as position 1.
- d. Position of the primer within *clpA* (Z1119), which is located directly upstream of the integrase gene of OI 43 in strain EDL933 (Fig. S1A).
- e. Position of the primer within *yedU* (Z1558), which is located directly upstream of the integrase gene of OI 48 in strain EDL933 (Fig. S1A).
- f. Last genes of OI 43 and OI 48, respectively.
- g. Positions of the primer within *serW* and *serX* genes (which are 100% identical).
- h. Position of the primer within *infA* (Z1228), which is located downstream of OI 43 (Fig. S1A).
- i. Position of the primer within *yedW* (Z1666) which is located downstream of OI 48 (Fig. S1A).
- j. n.a., not applicable
- k. Position of the primer within *recA*(Z4002).
- l. Full sequencing of the PCR product was not possible due to the presence of an additional IS629 besides Z1638/Z1339 in the PCR fragment. However, the existence of two IS elements has been verified by restriction digestion with *HindIII*, a single cutting enzyme in IS629, which resulted in three restriction fragments of the expected size (data not shown). According to sequencing data additional *HindIII* restriction sites in flanking regions were excluded.

Table S2. PCR primers for analysis of the core genome deletions in strain 95S.

| Primer             | Sequence (5' - 3')                                | Target                   | Annealing temperature | PCR product (bp) |
|--------------------|---------------------------------------------------|--------------------------|-----------------------|------------------|
| yedU-1<br>yedU-2   | GTGGGATTCTGGCCCTGGTGC<br>GCGTACCGCCTGGAGAAGCG     | Z1558<br>( <i>yedU</i> ) | 59°C                  | 538              |
| Z1549-1<br>Z1549-2 | GCACTGAGCCCATCTATC<br>ATTCGGCACATAGTCCAG          | Z1549                    | 55°C                  | 554              |
| Z1539-1<br>Z1539-2 | AGCCATCACTATCACAAGCAA<br>CCTTCAGGGATTAAGTGCAA     | Z1539                    | 58°C                  | 494              |
| Z1528-1<br>Z1528-2 | TGATTGCTAACGGAGCATTG<br>GCAGCGCGGATAAAAACACTAC    | Z1528                    | 59°C                  | 712              |
| Z1522-1<br>Z1522-2 | GCATTTTCAACCTCATCC<br>TCCACCTTCCCTATTTCC          | Z1522                    | 54°C                  | 674              |
| Z1513-1<br>Z1513-2 | CCAGGCGAATCATAAGAC<br>TCGCTGAACCGCATTATC          | Z1513                    | 55°C                  | 607              |
| Z1505-1<br>Z1505-2 | AATCAGCCCGAACACAAC<br>CTGGATGGCGGTAATGAC          | Z1505                    | 55°C                  | 574              |
| Z1495-1<br>Z1495-2 | GGCAACTGTTACGCACTC<br>CGAATGCCTCACGAATAC          | Z1495                    | 55°C                  | 1224             |
| Z1486-1<br>Z1486-2 | CCGAATGATGATGAAACC<br>ACATCCTGCTTACCATCC          | Z1486                    | 54°C                  | 791              |
| Z1477-1<br>Z1477-2 | CGTGAAGCCTGGTTTGTC<br>GCCCCTGAATAACCTCTG          | Z1477                    | 55°C                  | 784              |
| LP43<br>LP44       | ATCCTATTCCCGGGAGTTTACG<br>GCGTCATCGTATACACAGGAGC  | Z1464                    | 57°C                  | 584              |
| wrbA1<br>wrbA2     | ATGGCTAAAGTTCTGGTG<br>CTCCTGTTGAAGATTAGC          | Z1423                    | 53°C                  | 600              |
| Z1409-1<br>Z1409-2 | TGCGTAACCAATCACCGTAA<br>CTGAATTAATCGGCGCTCTC      | Z1409                    | 59°C                  | 605              |
| Z1408-1<br>Z1408-2 | GGCTCCCTTGTGGAGCCTTTTT<br>CGCCAGTAAGGTGTTGGTTCCCG | Z1408                    | 57°C                  | 155              |

| Primer             | Sequence (5' - 3')                              | Target | Annealing temperature | PCR product (bp) |
|--------------------|-------------------------------------------------|--------|-----------------------|------------------|
| Z1406-1<br>Z1406-2 | TCCTGATGATGGCAGCAAAGACG<br>GGGCCACGTTGACCCTGCTC | Z1406  | 57°C                  | 120              |
| Z1405-1<br>Z1405-2 | CGCTGTTGGTCCTCGCAGGC<br>ACCTTTGATCGCAAAGCGGCA   | Z1405  | 58°C                  | 162              |
| Z1404-1<br>Z1404-2 | GCGCGTAGTGGACGTGGTGG<br>GACGCCAGCTGCGTTTGCTG    | Z1404  | 59°C                  | 259              |
| Z1403-1<br>Z1403-2 | ACACAGCACATCGCGACCCG<br>TCAGCAGATCCAGGCGTTGCC   | Z1403  | 59°C                  | 364              |
| Z1402-1<br>Z1402-2 | CACAGGGCAACAGGGGCGAC<br>TTCCGTTGGCCCCGTGGAGA    | Z1402  | 60°C                  | 504              |
| Z1401-1<br>Z1401-2 | TTGCGCAGGCTGGCTACGTC<br>TGCGCTGTTCCCATGGCTG     | Z1401  | 59°C                  | 946              |
| Z1400-1<br>Z1400-2 | AGCGTTACCCAGCGCTTCCG<br>CGCAGGCTAACCCGGAGCTG    | Z1400  | 59°C                  | 647              |
| Z1399-1<br>Z1399-2 | GACCTCGGGAGCGATTGCGG<br>CATTGGCGAGCGCTTGCTGC    | Z1399  | 59°C                  | 241              |
| Z1398-1<br>Z1398-2 | GCAGGCTGGTGCCGACAGAG<br>GAAGTGCGCAGCGAGCTGGA    | Z1398  | 60°C                  | 1174             |
| Z1397-1<br>Z1397-2 | TCGTCATGGTGTGCGTGCCC<br>ATCCTTCCCCACCCCGGCTC    | Z1397  | 59°C                  | 666              |
| Z1396-1<br>Z1396-2 | TAGCGTTGGTGCGCACTGGG<br>CAGCGTGATGCCTGCCGTGA    | Z1396  | 59°C                  | 775              |
| Z1395-1<br>Z1395-2 | CCTGCTGGTGACGTGGCTGG<br>ACGGCAAACCTCCAGAGCGCC   | Z1395  | 59°C                  | 917              |
| Z1394-1<br>Z1394-2 | ACAGCCCGCAGGTGATTG<br>TCAATGGGCGGGCGGTAAC       | Z1349  | 58°C                  | 352              |
| Z1376-1<br>Z1376-2 | TCCACGGGGCTGAAAATC<br>GGAGAGCGTTTTCGTCAC        | Z1376  | 56°C                  | 375              |
| Z1349-1<br>Z1349-2 | GTGAGGGCGTTTATTTTG<br>GCATTCAGTCCCAGTGTC        | Z1349  | 56°C                  | 844              |

| Primer             | Sequence (5' - 3')                              | Target                   | Annealing temperature | PCR product (bp) |
|--------------------|-------------------------------------------------|--------------------------|-----------------------|------------------|
| Z1329-1<br>Z1329-3 | GCAGTTCCGGTAATCCTGTG<br>AATCCAGGAAATTGCAGCAC    | Z1329                    | 60°C                  | 331              |
| Z1309-1<br>Z1309-2 | ACCGATCATTGTTTGGCAGT<br>GAAACTCCTGTTTCGGCGTA    | Z1309                    | 60°C                  | 543              |
| Z1297-1<br>Z1297-2 | GGCTGACGGTGGTGAAAATAC<br>GTTTTGCTGATTTCCGCCACAC | Z1297                    | 56°C                  | 405              |
| Z1280-1<br>Z1280-2 | AAATCCTGACGCTGCCTTCTG<br>CAGGTCGGTAAGCATTTCAC   | Z1280                    | 58°C                  | 602              |
| Z1270-1<br>Z1270-2 | ATCCCTCGTTCCGTCTTGTCG<br>TGGCTGATTCTCTTCGGTTTC  | Z1270                    | 57°C                  | 438              |
| Z1256-1<br>Z1256-2 | TGGCACTAGCGGCATTACATC<br>CCGAGGAGGCGTCAAGGAAAA  | Z1256                    | 57°C                  | 327              |
| Z1243-1<br>Z1243-2 | CAGGGCGAGCAATGTAAGGTG<br>ATGATGCTGCCGTTTTGCTTG  | Z1243                    | 55°C                  | 225              |
| Z1232-1<br>Z1232-2 | TTTGATGTAGCCGTTTTCCAG<br>CCGTGGAGTTTCTGCTTGTGC  | Z1232                    | 56°C                  | 406              |
| clpA-1<br>clpA-2   | GAATCAGCTTGCGCGCGTGG<br>TTCGTCCAGCAGCAGCACCG    | Z1119<br>( <i>clpA</i> ) | 59°C                  | 1168             |
| Z1118-1<br>Z1118-2 | TTCGCGACGCGCTAAAACCG<br>TGTTTTCTGCAACCTCGGCGG   | Z1118                    | 59°C                  | 198              |
| Z1117-1<br>Z1117-2 | TGCCTTTTGGCCCCTGGTGG<br>CATCTGCCCTGAAGGCGGCG    | Z1117                    | 59°C                  | 125              |
| Z1116-1<br>Z1116-2 | TGCTTCGCGCCCAGGAGTTG<br>ACCTGCGCACGACCGTTCAG    | Z1116                    | 59°C                  | 838              |
| Z1115-1<br>Z1115-2 | TGCTGGCGACCGGAAAGCTG<br>CCGGATCGCCTAACGCCGAC    | Z1115                    | 59°C                  | 804              |
| Z1112-1<br>Z1112-2 | CGCCGACGGTATTCAGCCCG<br>ATCGCCCTTACCTTGCGGCG    | Z1112                    | 59°C                  | 649              |
| Z1110-1<br>Z1110-2 | CTGGCGTCTGGGGCCAAGTG<br>CAGCCACAGCACGCGTGAGA    | Z1110                    | 59°C                  | 595              |

| Primer             | Sequence (5' - 3')                              | Target | Annealing temperature | PCR product (bp) |
|--------------------|-------------------------------------------------|--------|-----------------------|------------------|
| Z1109-1<br>Z1109-2 | CAGCCGCCCTGGAAGATGGC<br>ATTGCCCAGGTTGTCTGGCGG   | Z1109  | 59°C                  | 344              |
| Z1108-1<br>Z1108-2 | CGCGCTCCCGATTACCGGAC<br>CGCTTCGCCAACAAGCTGCG    | Z1108  | 59°C                  | 617              |
| Z1107-1<br>Z1107-2 | AGCATTTCGCCGTGGGTGTAG<br>GCAGGGGATGTGTGGTAAAAC  | Z1107  | 57°C                  | 762              |
| Z1097-1<br>Z1097-2 | CGCGGAAAATATTCCAACAG<br>TCATCAGCAAATCCAAGCAC    | Z1097  | 59°C                  | 573              |
| Z1087-1<br>Z1087-2 | TGGTTTGCTGGTGGGTATTGG<br>CGGCATCTTTGGTAACTTTGG  | Z1087  | 55°C                  | 500              |
| Z1074-1<br>Z1074-2 | TCGGCATCTCAATCTGGCTAC<br>CATTGGCGTTTTAGTCGTATC  | Z1074  | 56°C                  | 908              |
| Z1063-1<br>Z1063-2 | ATTCCGAAGTTGGCGATGATG<br>GCCGTAGTTTTTGCCTTTTTG  | Z1063  | 56°C                  | 443              |
| Z1054-1<br>Z1054-2 | TTTGCTTTCCCATTCCTTAC<br>CTCTTTTTGCCCTTACCTTC    | Z1054  | 56°C                  | 480              |
| Z1045-1<br>Z1045-2 | TTACCCACCGAGCCAATGACC<br>TCCACTCAGCCTAACCTCAGC  | Z1045  | 58°C                  | 998              |
| Z1035-1<br>Z1035-2 | TAGCAGGAACCACAGACCAAG<br>TGCGTCTATTCAAGGTGGAG   | Z1035  | 57°C                  | 347              |
| Z1026-1<br>Z1026-2 | ACCCATAATCGCCGTCATCAG<br>GGATACTACCCGCACGATGAC  | Z1026  | 58°C                  | 826              |
| Z1017-1<br>Z1017-2 | CCACGGTAATAAATCGCAAGG<br>TGATTTTCGCACCACCTTCTCC | Z1017  | 58°C                  | 436              |

All primers were designed in this study except for LP43 and LP44 (Friedrich *et al.*, 2002) and wrbA1 and wrbA2 (Bielaszewska *et al.*, 2006b).

Table S3. Quantitative real time RT-PCR assays to determine transcription of *iha* and non-*iha* adhesins in L and S strains.

| Primer                | Sequence (5' - 3')                                   | Target                        | Annealing temperature | PCR product (bp) | Reference                                              |
|-----------------------|------------------------------------------------------|-------------------------------|-----------------------|------------------|--------------------------------------------------------|
| GapA_for<br>GapA_rev  | GTTGTCGCTGAAGCAACTGG<br>AGCGTTGGAAACGATGTCCT         | <i>gapA</i>                   | 53°C - 60°C           | 171              | Blumer <i>et al.</i> , 2005                            |
| K14924<br>K14925      | TTACCAGCGATACCAAGAGC<br>CAACATGACCGATGACAAGG         | <i>eae</i>                    | 59°C                  | 126              | Chen <i>et al.</i> , 2007                              |
| CMD306<br>CMD307      | GGCTGAATCTGCAGGAAAGCAACA<br>TGCAGGCTGACAGAATCATCCACA | <i>iha</i>                    | 60°C                  | 95               | Léveillé <i>et al.</i> , 2006                          |
| ehaA-F<br>ehaA-R1     | AGCGTTAGGGGCACAGGAAG<br>CCTCGCTGCCACTGACAATA         | <i>ehaA</i>                   | 54°C                  | 161              | This study <sup>a</sup>                                |
| LPFA1-CF<br>LPFA1-CR1 | GGTTGGTGACAAATCCCCG<br>CGTCTGGCCTTTACTCAGA           | <i>lpfA1</i><br>(O157/OI-141) | 53°C                  | 244              | Torres <i>et al.</i> , 2009                            |
| LPFA2-F1<br>LPFA2-CR  | GCAGGTCACCTACAGGCGGC<br>GCTAATACCAGCGGCAGCATCGT      | <i>lpfA2</i><br>(O157/OI-154) | 57°C                  | 306              | This study <sup>b</sup><br>Torres <i>et al.</i> , 2009 |

- a. The primers were derived from a 851-bp fragment of *ehaA* passenger domain sequenced in our laboratory, which was 100% identical in all L and S strains and also to the respective sequences in EHEC O157:H7 strains EDL933 and Sakai (data not shown).
- b. The primer was derived from the sequence of *lpfA2* of strain EDL933 (GenBank accession no. AE005174).



Table S4. Plasmids and *E. coli* constructs used in this study.

| Plasmid or construct                                | Description                                                                                                                                                            | Source or reference              |
|-----------------------------------------------------|------------------------------------------------------------------------------------------------------------------------------------------------------------------------|----------------------------------|
| <b>Plasmids</b>                                     |                                                                                                                                                                        |                                  |
| pWKS30                                              | <i>ori</i> pSC101, <i>bla</i>                                                                                                                                          | Wang and Kushner, 1991           |
| pWKS30 <i>iha</i>                                   | pWKS30 with a 2,916-bp fragment containing <i>iha</i> from EHEC O157:H7 Sakai (RIMD 0509952)                                                                           | This study                       |
| pKD3                                                | <i>bla</i> FRT <i>cat</i> <i>oriR<math>\gamma</math></i>                                                                                                               | Datsenko and Wanner, 2000        |
| pKD46                                               | <i>bla</i> <i>araC</i> - <i>ParaB</i> - $\gamma$ - $\beta$ - <i>exo</i> <i>oriR101</i> <i>repA101</i> (ts)                                                             | Datsenko and Wanner, 2000        |
| pKD4                                                | <i>kan</i> FRT <i>cat</i> <i>oriR<math>\gamma</math></i>                                                                                                               | Datsenko and Wanner, 2000        |
| pKD4 <i>iha</i>                                     | pKD4 with a 2,916-bp fragment ( <i>Bst</i> BI/ <i>Hind</i> III) containing <i>iha</i> from EHEC O157:H7 Sakai (RIMD 0509952)                                           | This study                       |
| pCP20                                               | <i>bla</i> <i>cat</i> <i>flp</i> (ts)                                                                                                                                  | Cherepanov and Wackernagel, 1995 |
| pGEM-T easy                                         | <i>bla</i> <i>lacZ<math>\alpha</math></i>                                                                                                                              | Promega                          |
| pTerE                                               | pGEM-T Easy containing a 399-bp internal <i>terE</i> fragment                                                                                                          | This study                       |
| <b>Constructs</b>                                   |                                                                                                                                                                        |                                  |
| 154L $\Delta$ <i>iha</i>                            | 154L $\Delta$ <i>iha</i>                                                                                                                                               | This study                       |
| 154L $\Delta$ <i>iha</i> /pWKS30 <i>iha</i>         | 154L $\Delta$ <i>iha</i> containing pWKS30 <i>iha</i> , Ap <sup>R</sup>                                                                                                | This study                       |
| 154L $\Delta$ <i>iha</i> /pWKS30                    | 154L $\Delta$ <i>iha</i> containing pWKS30, Ap <sup>R</sup>                                                                                                            | This study                       |
| 154S <i>glmS</i> :: <i>iha</i>                      | 154S chromosomally complemented (downstream of <i>glmS</i> ) with <i>iha</i> from EHEC O157:H7 Sakai (RIMD 0509952), Km <sup>R</sup>                                   | This study                       |
| Sakai $\Delta$ <i>iha</i>                           | EHEC O157:H7 Sakai (RIMD 0509952) $\Delta$ <i>iha</i>                                                                                                                  | This study                       |
| Sakai $\Delta$ <i>iha</i> <i>glmS</i> :: <i>iha</i> | EHEC O157:H7 Sakai $\Delta$ <i>iha</i> chromosomally complemented (downstream of <i>glmS</i> ) with <i>iha</i> from EHEC O157:H7 Sakai (RIMD 0509952), Km <sup>R</sup> | This study                       |

Table S5. Primers used for construction of *iha* deletion and complementation mutants.

| Primer <sup>a</sup> | Sequence (5' - 3')                                                          |
|---------------------|-----------------------------------------------------------------------------|
| del_aha_for         | GTATTTGTGTATTGCTTGCCGGTTAACATGATCGGAGATTAGTAATATGGTGTAGGCTGGAGCTGCTT        |
| del_aha_rev         | TGCAGTGGCAACGTATTCTACCGTCAGTGATAGCGTTTTGTTATTATCACATATGAATATCCTCCTTAGTTCCTA |
| aha_for2            | GGTTTCGAACAATGTGGGCTGACATGA                                                 |
| aha_rev             | CGGTAGCTGCAAACTTAACG                                                        |
| aha-pKD4_for        | CCTTTTTGCGTGGCCAGTGCCAAGCTTGCATGCAGATTGCAGCATTACACAACAATGTGGGCTGACATGA      |
| aha-pKD4_rev        | AAAGTATAGGAACTTCGAAGCAGCTCCAGCCTACACAATCGCTCAAGACCGGTAGCTGCAAACTTAACG       |
| aha-int_for         | AACTCCATTAATTTGATATTATTCCTGTGTGTTATCCATTTATTAATTTAACAATGTGGGCTGACATGA       |
| aha-int_rev         | ACTTACCAGCATTAAATAATCTAACCTCATTCCATATAATTA ACTTCAGCTACGGCTGACATGGGAATTAG    |

a. All primers were designed in this study.
